# Supplementary material for: Evaluation of drought stress level in Sargent’s cherry (Prunus sargentii Rehder) using photosynthesis and chlorophyll fluorescence parameters and proline content analysis
Source: PeerJ. 2023 Oct 11;11:e15954. doi: 10.7717/peerj.15954 (PMC10576498; doi:10.7717/peerj.15954)
Supplement: Supplemental Information 1 [file peerj-11-15954-s001.xlsx]

## Sheet: environmental variables
day	Air temperature (°C)	Relative humidity (%)	Solar radiation (W/m2)
1/8/2021	20.1	71	0
1/8/2021	20.1	71	0
1/8/2021	19.8	73	0
1/8/2021	19.4	74	0
1/8/2021	19.1	75	0
1/8/2021	18.8	77	0
1/8/2021	18.5	78	0
1/8/2021	18.2	79	0
1/8/2021	18	80	0
1/8/2021	17.9	80	0
1/8/2021	17.9	80	0
1/8/2021	17.7	81	3.92
1/8/2021	16.8	82	32.78
1/8/2021	17.1	83	83.47
1/8/2021	19	86	121.85
1/8/2021	20.2	85	149.48
1/8/2021	21.2	82	184.5
1/8/2021	22.5	78	226.42
1/8/2021	23.6	74	425.52
1/8/2021	25	69	574.41
1/8/2021	26.4	65	685.93
1/8/2021	27.8	60	746
1/8/2021	28.4	56	861.16
1/8/2021	30.1	52	922.02
1/8/2021	31.4	49	224.23
1/8/2021	30.5	49	163.32
1/8/2021	29.7	49	322.07
1/8/2021	31.6	43	221.71
1/8/2021	30.7	42	985.96
1/8/2021	31.8	33	368.42
1/8/2021	31.8	29	141.75
1/8/2021	31.8	26	124.6
1/8/2021	31.2	23	124.99
1/8/2021	31.8	25	424.68
1/8/2021	31.4	24	148.92
1/8/2021	31.6	25	181.81
1/8/2021	29.5	26	50.57
1/8/2021	26.8	30	30.62
1/8/2021	25.4	32	8.24
1/8/2021	24.9	34	0
1/8/2021	23.2	38	0
1/8/2021	22.1	40	0
1/8/2021	21.1	44	0
1/8/2021	20.2	48	0
1/8/2021	19	51	0
1/8/2021	18.5	53	0
1/8/2021	18.2	53	0
1/8/2021	17.4	53	0
2/8/2021	16.5	56	0
2/8/2021	15.8	59	0
2/8/2021	14.4	61	0
2/8/2021	14.1	63	0
2/8/2021	13.8	66	0
2/8/2021	13.4	67	0
2/8/2021	13.1	69	0
2/8/2021	12.8	70	0
2/8/2021	12.6	71	0
2/8/2021	12.7	72	0
2/8/2021	12.7	73	0
2/8/2021	12.5	74	4.69
2/8/2021	12.6	76	49.09
2/8/2021	13.6	80	57.71
2/8/2021	14.9	80	68.73
2/8/2021	16.5	76	117.2
2/8/2021	19	66	176.38
2/8/2021	20.5	60	218.07
2/8/2021	21.7	53	548.86
2/8/2021	24.2	47	820.76
2/8/2021	26.8	40	941.63
2/8/2021	29	33	966.4
2/8/2021	30.6	30	1043.96
2/8/2021	31.8	27	1062.84
2/8/2021	32.3	23	1062.67
2/8/2021	32.9	21	1059.82
2/8/2021	33.8	22	1076.57
2/8/2021	34.3	14	1032.47
2/8/2021	34.5	17	1016.61
2/8/2021	34	21	520.11
2/8/2021	32.7	19	270.58
2/8/2021	31.5	21	187.19
2/8/2021	31.2	21	174.25
2/8/2021	32.1	20	560.74
2/8/2021	30.9	22	174.25
2/8/2021	30.8	22	115.07
2/8/2021	27.8	26	75.38
2/8/2021	25.5	30	40.78
2/8/2021	24.4	32	0.46
2/8/2021	22.9	34	0
2/8/2021	21.7	39	0
2/8/2021	20.6	43	0
2/8/2021	20.1	48	0
2/8/2021	19.5	52	0
2/8/2021	18.8	55	0
2/8/2021	18.2	57	0
2/8/2021	17.7	59	0
2/8/2021	17.5	61	0
3/8/2021	17.3	62	0
3/8/2021	17.2	63	0
3/8/2021	17.1	64	0
3/8/2021	17	65	0
3/8/2021	16.8	68	0
3/8/2021	15.8	70	0
3/8/2021	15.7	70	0
3/8/2021	15.7	71	0
3/8/2021	15.7	72	0
3/8/2021	15.7	73	0
3/8/2021	15.7	73	0
3/8/2021	15.7	74	2.92
3/8/2021	16.1	75	32.9
3/8/2021	16.6	77	56.11
3/8/2021	18.3	77	77.78
3/8/2021	19.2	75	124.82
3/8/2021	20.2	72	141.63
3/8/2021	21.1	70	171.22
3/8/2021	21.8	68	197.33
3/8/2021	22.7	65	300
3/8/2021	23.9	64	285.54
3/8/2021	24.7	62	232.19
3/8/2021	24.8	61	331.21
3/8/2021	25.4	60	433.53
3/8/2021	26.2	58	475.45
3/8/2021	27.4	56	1052.14
3/8/2021	29	54	1219.19
3/8/2021	30.1	51	314.01
3/8/2021	29.5	52	429.72
3/8/2021	30.3	51	434.49
3/8/2021	30.6	51	326.17
3/8/2021	30.1	50	244.97
3/8/2021	29.3	51	165.45
3/8/2021	29.3	52	361.81
3/8/2021	28.8	53	152.73
3/8/2021	28.1	54	287.84
3/8/2021	27.6	54	60.85
3/8/2021	25.4	59	26.87
3/8/2021	24.5	63	5.19
3/8/2021	23.5	66	0
3/8/2021	22.7	68	0
3/8/2021	22.1	70	0
3/8/2021	21.7	73	0
3/8/2021	21.5	74	0
3/8/2021	20.9	76	0
3/8/2021	20.5	77	0
3/8/2021	20.3	79	0
3/8/2021	20.3	80	0
4/8/2021	20.9	83	0
4/8/2021	20.9	82	0
4/8/2021	20.9	83	0
4/8/2021	21	83	0
4/8/2021	20.7	83	0
4/8/2021	20.5	83	0
4/8/2021	20.5	84	0
4/8/2021	20.7	86	0
4/8/2021	20.8	85	0
4/8/2021	21	85	0
4/8/2021	21.2	85	0
4/8/2021	21.1	84	5.82
4/8/2021	21.1	84	37.02
4/8/2021	21.2	85	62.08
4/8/2021	21.6	86	100.05
4/8/2021	22.5	85	116.75
4/8/2021	23.3	83	169.88
4/8/2021	24.1	79	382.76
4/8/2021	25.3	75	511.6
4/8/2021	27.3	70	710.08
4/8/2021	29.4	63	620.25
4/8/2021	30.8	59	846.37
4/8/2021	31.5	54	980.58
4/8/2021	32.7	50	951.27
4/8/2021	33.5	48	1021.77
4/8/2021	34.7	43	1062.11
4/8/2021	35.6	39	1073.55
4/8/2021	36.5	36	534.29
4/8/2021	36.4	35	853.04
4/8/2021	35.9	35	790.11
4/8/2021	34.9	39	345.11
4/8/2021	34.2	40	171.28
4/8/2021	34	41	157.77
4/8/2021	35.1	40	235.94
4/8/2021	33.7	42	270.18
4/8/2021	33.7	42	175.7
4/8/2021	31.8	44	86.83
4/8/2021	29.5	49	43.49
4/8/2021	27.9	52	21.94
4/8/2021	26.4	56	0
4/8/2021	25.5	60	0
4/8/2021	25	61	0
4/8/2021	24.4	63	0
4/8/2021	23.6	65	0
4/8/2021	22.7	67	0
4/8/2021	22.1	69	0
4/8/2021	21.3	71	0
4/8/2021	20.9	74	0
5/8/2021	20.5	75	0
5/8/2021	20.2	77	0
5/8/2021	20	78	0
5/8/2021	19.9	81	0
5/8/2021	19.7	81	0
5/8/2021	19.5	82	0
5/8/2021	19.3	83	0
5/8/2021	19.2	83	0
5/8/2021	19	84	0
5/8/2021	18.9	85	0
5/8/2021	18.6	85	0
5/8/2021	18.5	85	20.16
5/8/2021	18.9	87	39.55
5/8/2021	19.5	88	66.64
5/8/2021	20.1	89	88.9
5/8/2021	20.9	90	124.43
5/8/2021	22.1	88	210.84
5/8/2021	23.9	87	205.52
5/8/2021	25.4	76	306.55
5/8/2021	27.5	70	494.73
5/8/2021	29.3	63	579.01
5/8/2021	30.5	58	630.17
5/8/2021	31.6	54	778.5
5/8/2021	33.1	50	602.43
5/8/2021	33.8	48	599.35
5/8/2021	34	45	776.49
5/8/2021	35	42	608.26
5/8/2021	35.3	40	1019.69
5/8/2021	36.4	35	662.22
5/8/2021	36.1	33	431.24
5/8/2021	34.7	35	317.48
5/8/2021	34	35	246.87
5/8/2021	33.6	38	234.54
5/8/2021	33.5	38	226.59
5/8/2021	32.1	40	186.07
5/8/2021	32.1	41	107.9
5/8/2021	30.4	44	73.84
5/8/2021	28.8	49	50.51
5/8/2021	27.6	50	20.46
5/8/2021	26.4	52	0
5/8/2021	25.1	57	0
5/8/2021	24.1	61	0
5/8/2021	23.5	64	0
5/8/2021	22.9	65	0
5/8/2021	22.4	67	0
5/8/2021	22.2	68	0
5/8/2021	21.9	70	0
5/8/2021	21.7	71	0
6/8/2021	21.6	72	0
6/8/2021	21.5	72	0
6/8/2021	21.2	73	0
6/8/2021	21	73	0
6/8/2021	20.7	75	0
6/8/2021	20.6	76	0
6/8/2021	20.5	76	0
6/8/2021	20.4	76	0
6/8/2021	20.5	76	0
6/8/2021	20.5	76	0
6/8/2021	20.5	76	0
6/8/2021	20.5	76	0
6/8/2021	20.6	76	19.91
6/8/2021	20.9	77	52.23
6/8/2021	21.2	76	75.69
6/8/2021	21.6	75	100.78
6/8/2021	22.1	73	119.89
6/8/2021	22.6	72	177.83
6/8/2021	23.4	73	131.55
6/8/2021	24.3	70	270.3
6/8/2021	25.4	67	366.57
6/8/2021	26.2	62	511.03
6/8/2021	27.5	59	478.93
6/8/2021	29	55	755.86
6/8/2021	30.7	51	888.23
6/8/2021	32	48	821.66
6/8/2021	33.1	44	813.14
6/8/2021	33.8	43	885.31
6/8/2021	33.9	41	364.33
6/8/2021	33.4	41	420.87
6/8/2021	33.3	41	328.46
6/8/2021	32.8	41	252.08
6/8/2021	31.9	42	165
6/8/2021	31	43	40.84
6/8/2021	28.6	49	31.61
6/8/2021	25.5	60	54.88
6/8/2021	23.8	66	0
6/8/2021	22.3	69	0.77
6/8/2021	21.6	72	0
6/8/2021	21.1	74	0
6/8/2021	20.7	76	0
6/8/2021	20.5	77	0
6/8/2021	20.5	79	0
6/8/2021	20.5	80	0
6/8/2021	20.4	80	0
6/8/2021	20.4	81	0
6/8/2021	20.3	82	0
6/8/2021	20.3	82	0
7/8/2021	20.3	83	0
7/8/2021	20.2	83	0
7/8/2021	20	83	0
7/8/2021	20	83	0
7/8/2021	19.7	85	0
7/8/2021	19.7	85	0
7/8/2021	19.8	86	0
7/8/2021	19.7	86	0
7/8/2021	19.2	86	0
7/8/2021	19	86	0
7/8/2021	19.1	87	0
7/8/2021	19.1	87	0.92
7/8/2021	19.3	88	18.37
7/8/2021	19.6	89	33.88
7/8/2021	20	89	59.49
7/8/2021	20.5	90	91.87
7/8/2021	21.3	89	170.72
7/8/2021	22.3	84	288.23
7/8/2021	23.6	79	465.87
7/8/2021	25.2	71	597.05
7/8/2021	26.8	64	715.52
7/8/2021	28.3	58	777.78
7/8/2021	29.5	54	888.28
7/8/2021	30.6	50	913.73
7/8/2021	31.6	48	971.78
7/8/2021	32.9	43	994.36
7/8/2021	34.2	40	1004.56
7/8/2021	34.9	38	943.03
7/8/2021	34.9	36	907.84
7/8/2021	33.6	36	335.8
7/8/2021	32.6	37	257.35
7/8/2021	32.3	37	284.25
7/8/2021	31.8	37	199.86
7/8/2021	32.3	36	386.01
7/8/2021	31.5	35	221.88
7/8/2021	31.2	35	172.96
7/8/2021	29.3	36	71.87
7/8/2021	26.7	40	42.93
7/8/2021	25.5	44	17.76
7/8/2021	23.9	51	0
7/8/2021	22.3	52	0
7/8/2021	21.1	55	0
7/8/2021	20.5	58	0
7/8/2021	20.3	60	0
7/8/2021	20.1	60	0
7/8/2021	19.6	62	0
7/8/2021	19	62	0
7/8/2021	18.4	64	0
8/8/2021	17.9	64	0
8/8/2021	17.5	64	0
8/8/2021	17.1	64	0
8/8/2021	16.7	66	0
8/8/2021	16.3	66	0
8/8/2021	15.8	68	0
8/8/2021	15.7	70	0
8/8/2021	14.4	71	0
8/8/2021	14.4	72	0
8/8/2021	14.3	72	0
8/8/2021	14.1	73	0
8/8/2021	14	74	7.41
8/8/2021	14.2	75	31.67
8/8/2021	14.4	77	48.04
8/8/2021	15.7	78	64.48
8/8/2021	17.6	76	81
8/8/2021	18.9	75	134.52
8/8/2021	20.7	70	149.14
8/8/2021	22.7	60	567.18
8/8/2021	25.4	52	731.43
8/8/2021	28.1	45	864.19
8/8/2021	30.3	41	930.93
8/8/2021	31.6	39	973.97
8/8/2021	32.9	36	1019.92
8/8/2021	34.3	33	1064.08
8/8/2021	35.8	31	1073.32
8/8/2021	36.7	28	1072.87
8/8/2021	36.7	29	1030.51
8/8/2021	37.4	27	1001.37
8/8/2021	36.3	28	685.48
8/8/2021	35.3	29	183.38
8/8/2021	34.6	30	160.18
8/8/2021	34	29	145.16
8/8/2021	35.6	27	477.19
8/8/2021	34.9	28	304.93
8/8/2021	34.8	28	189.15
8/8/2021	32.3	28	59.68
8/8/2021	29.8	34	38.56
8/8/2021	27	39	17.51
8/8/2021	25.4	44	0
8/8/2021	23.7	49	0
8/8/2021	22.4	51	0
8/8/2021	21.4	52	0
8/8/2021	20.6	52	0
8/8/2021	20.1	52	0
8/8/2021	19.3	54	0
8/8/2021	19	55	0
8/8/2021	18.5	57	0
9/8/2021	18	59	0
9/8/2021	17.7	61	0
9/8/2021	17.5	65	0
9/8/2021	17.3	67	0
9/8/2021	17	68	0
9/8/2021	16.8	70	0
9/8/2021	16.5	71	0
9/8/2021	16.3	72	0
9/8/2021	16	74	0
9/8/2021	15.8	76	0
9/8/2021	14.9	77	0
9/8/2021	14.9	78	6.72
9/8/2021	14.9	80	27.17
9/8/2021	15.5	80	39.18
9/8/2021	16.2	81	56.48
9/8/2021	18.1	82	73.35
9/8/2021	19.6	78	138.66
9/8/2021	21.6	73	147.69
9/8/2021	24	67	317.03
9/8/2021	26.7	60	750.93
9/8/2021	29.7	53	850.85
9/8/2021	31.9	48	916.53
9/8/2021	33.6	40	989.49
9/8/2021	34.8	35	1004.06
9/8/2021	35.7	31	1037.68
9/8/2021	36.3	29	1037.79
9/8/2021	37.1	28	1022.66
9/8/2021	37.4	28	1004.73
9/8/2021	37.6	28	983.83
9/8/2021	37	28	566.06
9/8/2021	36.3	29	187.98
9/8/2021	35.6	30	510.53
9/8/2021	35.6	31	105.26
9/8/2021	37.2	29	564.89
9/8/2021	36.5	29	239.76
9/8/2021	36.8	30	143.93
9/8/2021	33.6	33	44.04
9/8/2021	30.8	37	25.45
9/8/2021	29.1	42	18.31
9/8/2021	27.6	46	0
9/8/2021	25.6	51	0
9/8/2021	24.6	55	0
9/8/2021	23.4	59	0
9/8/2021	22.8	60	0
9/8/2021	22.3	62	0
9/8/2021	21.9	64	0
9/8/2021	21.7	66	0
9/8/2021	21.3	68	0
10/8/2021	21.1	69	0
10/8/2021	21.1	71	0
10/8/2021	21	71	0
10/8/2021	20.7	73	0
10/8/2021	20.4	74	0
10/8/2021	20.2	75	0
10/8/2021	20	77	0
10/8/2021	19.8	79	0
10/8/2021	19.7	80	0
10/8/2021	19.6	80	0
10/8/2021	19.5	81	0
10/8/2021	19.4	82	7.69
10/8/2021	19.6	83	28.84
10/8/2021	20.1	84	36.53
10/8/2021	20.8	85	49.34
10/8/2021	21.8	83	61.65
10/8/2021	23	80	130.43
10/8/2021	25	75	248.5
10/8/2021	26.5	70	681.95
10/8/2021	29.6	62	847.66
15/8/2021	33	42	1074.05
15/8/2021	34	39	1086.1
15/8/2021	35.1	36	1064.24
15/8/2021	34.7	36	378.51
15/8/2021	33.6	36	107.56
15/8/2021	33	35	633.31
15/8/2021	32.6	36	108.57
15/8/2021	32.8	36	94.9
15/8/2021	33.7	35	368.08
15/8/2021	35.1	33	137.49
15/8/2021	34	33	325.77
15/8/2021	33	35	204.68
15/8/2021	33.9	35	222.16
15/8/2021	33.5	35	56.54
15/8/2021	31.2	36	42.93
15/8/2021	29.3	42	32.84
15/8/2021	28	46	20.34
15/8/2021	26.6	50	6.86
15/8/2021	25.5	54	0
15/8/2021	24.9	58	0
15/8/2021	23.8	62	0
15/8/2021	23	63	0
15/8/2021	22.4	64	0
15/8/2021	22	66	0
15/8/2021	21.7	69	0
15/8/2021	21.4	70	0
15/8/2021	21.3	71	0
15/8/2021	21.2	71	0
15/8/2021	21.2	72	0
15/8/2021	21.1	73	0
15/8/2021	20.9	75	0
15/8/2021	20.6	76	0
16/8/2021	20.4	77	0
16/8/2021	20.3	77	0
16/8/2021	20.1	78	0
16/8/2021	20	79	0
16/8/2021	19.8	80	0
16/8/2021	19.7	80	0
16/8/2021	19.6	80	0
16/8/2021	19.3	80	0
16/8/2021	19.3	81	0
16/8/2021	19.2	81	0
16/8/2021	19.2	81	0
16/8/2021	19.1	81	0
16/8/2021	19.1	82	0
16/8/2021	19	82	0
16/8/2021	18.8	84	0
16/8/2021	18.5	84	0
16/8/2021	18.3	84	4.71
16/8/2021	18.1	85	19.73
16/8/2021	18.2	85	25.94
16/8/2021	18.4	86	32.65
16/8/2021	18.8	88	36.72
16/8/2021	19.3	89	38.81
16/8/2021	19.8	90	42.32
16/8/2021	20.3	89	51.86
16/8/2021	21	88	136.25
16/8/2021	22	84	89.8
16/8/2021	23.4	79	298.15
16/8/2021	25.1	70	714.34
16/8/2021	26.6	64	834.94
16/8/2021	28.6	59	891.2
16/8/2021	30.1	53	940.57
16/8/2021	31	50	991
16/8/2021	32	47	1006.52
16/8/2021	32.7	44	1071.42
16/8/2021	33.5	40	1070.18
16/8/2021	34.1	36	1094.34
16/8/2021	34.7	35	1063.35
16/8/2021	35.4	33	1066.77
16/8/2021	36.3	30	1002.83
16/8/2021	36.5	29	996.33
16/8/2021	36.8	29	815.6
16/8/2021	36.8	27	1062.17
16/8/2021	37.6	25	1064.97
16/8/2021	36.3	26	619.86
16/8/2021	36.3	27	293.94
16/8/2021	35.7	30	399.3
16/8/2021	35.1	30	286.83
16/8/2021	34.3	32	244.91
16/8/2021	33.5	34	290.19
16/8/2021	34.1	33	685.42
16/8/2021	33.7	33	507.9
16/8/2021	32.4	31	158.95
16/8/2021	31.1	33	261.61
16/8/2021	30.5	37	86.04
16/8/2021	29.5	40	66.88
16/8/2021	28.3	43	45.09
16/8/2021	26.9	45	21.2
16/8/2021	21.1	60	0
16/8/2021	25.6	50	4.71
16/8/2021	20.7	61	0
16/8/2021	24.7	53	0
16/8/2021	20.5	62	0
16/8/2021	23.6	56	0
16/8/2021	20.3	62	0
16/8/2021	22.8	56	0
16/8/2021	20.3	62	0
16/8/2021	22.4	57	0
16/8/2021	20.2	62	0
16/8/2021	21.9	59	0
16/8/2021	20.1	62	0
16/8/2021	21.5	59	0
16/8/2021	20	63	0
16/8/2021	19.7	64	0
16/8/2021	19.6	65	0
16/8/2021	19.4	65	0
16/8/2021	19.2	67	0
16/8/2021	19	68	0
16/8/2021	18.7	70	0
16/8/2021	18.4	71	0
17/8/2021	18.3	72	0
17/8/2021	18.1	73	0
17/8/2021	18	74	0
17/8/2021	17.9	74	0
17/8/2021	17.7	75	0
17/8/2021	17.6	76	0
17/8/2021	17.5	77	0
17/8/2021	17.4	78	0
17/8/2021	17.4	79	0
17/8/2021	17.3	79	5.61
17/8/2021	17.4	79	33.76
17/8/2021	17.7	80	37.46
17/8/2021	18	82	60.36
17/8/2021	18.5	83	75.93
17/8/2021	19	82	128.46
17/8/2021	20	81	142.75
17/8/2021	20.8	80	167.52
17/8/2021	21.6	76	183.49
17/8/2021	22.3	73	202.38
17/8/2021	23.3	72	386.52
17/8/2021	24.4	67	505.88
17/8/2021	25.4	63	384.5
17/8/2021	26.3	60	359.28
17/8/2021	26.9	58	470.86
17/8/2021	27.8	54	247.43
17/8/2021	27.7	54	327.73
17/8/2021	27.6	54	426.59
17/8/2021	28	53	489.8
17/8/2021	28.8	52	492.54
17/8/2021	29.5	51	423.5
17/8/2021	29.9	49	453.48
17/8/2021	30.3	47	479.65
17/8/2021	30.4	46	367.58
17/8/2021	30.1	45	432.36
17/8/2021	30.1	45	535.02
17/8/2021	30	44	426.59
17/8/2021	29.7	44	308.85
17/8/2021	29.2	44	242.89
17/8/2021	28.4	47	144.6
17/8/2021	27.6	49	217.96
17/8/2021	27.3	50	230.17
17/8/2021	27.4	52	183.27
17/8/2021	26.9	53	79.54
17/8/2021	26.2	54	107.23
17/8/2021	25.4	56	91.76
17/8/2021	25.4	56	70.02
17/8/2021	25.2	57	70.51
17/8/2021	24.9	58	36.78
17/8/2021	24.3	57	31.55
17/8/2021	23.9	59	3.54
17/8/2021	23.5	60	0
17/8/2021	23	62	0
17/8/2021	22.4	62	0
17/8/2021	22.1	64	0
17/8/2021	21.8	67	0
17/8/2021	21.6	68	0
17/8/2021	21.3	69	0
17/8/2021	21.1	71	0
17/8/2021	20.9	73	0
17/8/2021	20.7	75	0
17/8/2021	20.5	76	0
17/8/2021	20.5	78	0
17/8/2021	20.4	79	0
17/8/2021	20.4	79	0
17/8/2021	20.4	80	0
17/8/2021	20.3	80	0
17/8/2021	20.3	81	0
17/8/2021	20.3	81	0
17/8/2021	20.2	82	0
17/8/2021	20	82	0
17/8/2021	19.8	83	0
17/8/2021	19.7	84	0
18/8/2021	19.7	84	0
18/8/2021	19.7	84	0
18/8/2021	19.6	84	0
18/8/2021	19.5	85	0
18/8/2021	19.2	85	0
18/8/2021	18.8	85	0
18/8/2021	18.6	85	0
18/8/2021	18.6	86	0
18/8/2021	18.6	86	0
18/8/2021	18.5	87	0
18/8/2021	18.4	86	0
18/8/2021	18.1	86	4.62
18/8/2021	18	86	3.08
18/8/2021	17.8	86	7.76
18/8/2021	17.6	86	41.15
18/8/2021	17.5	86	35.85
18/8/2021	17.5	86	39.12
18/8/2021	17.5	86	59.43
18/8/2021	17.6	87	50.88
18/8/2021	17.7	88	69.84
18/8/2021	17.9	88	45.95
18/8/2021	18	89	70.02
18/8/2021	18.1	89	118.77
18/8/2021	18.3	89	109.36
18/8/2021	18.6	90	203.95
18/8/2021	19	90	209.72
18/8/2021	19.3	90	126
18/8/2021	19.3	89	50.45
18/8/2021	19.1	88	57.83
18/8/2021	19.1	88	93.94
18/8/2021	19.1	88	74.7
18/8/2021	19.2	89	72.79
18/8/2021	19.3	89	55.99
18/8/2021	19.3	89	54.08
18/8/2021	19.1	89	82.23
18/8/2021	19.1	89	108.4
18/8/2021	19.2	89	104.26
18/8/2021	19.2	89	67.44
18/8/2021	19.3	90	67.87
18/8/2021	19.5	90	74.27
18/8/2021	19.5	90	43.8
18/8/2021	19.5	90	69.34
18/8/2021	19.5	90	66.14
18/8/2021	19.5	90	40.72
18/8/2021	19.5	90	2.77
18/8/2021	19.4	90	28.84
18/8/2021	19.3	90	16.09
18/8/2021	19.3	90	0
18/8/2021	19.2	90	1.08
18/8/2021	19.2	90	5.33
18/8/2021	19.2	91	0
18/8/2021	19.2	91	0
18/8/2021	19.1	91	0
18/8/2021	19.1	91	0
18/8/2021	19	91	0
18/8/2021	19	91	0
18/8/2021	19	91	0
18/8/2021	19	91	0
18/8/2021	19	91	0
18/8/2021	18.9	92	0
18/8/2021	18.8	92	0
18/8/2021	18.8	92	0
18/8/2021	18.6	92	0
18/8/2021	18.6	92	0
18/8/2021	18.6	92	0
18/8/2021	18.5	92	0
18/8/2021	18.5	92	0
18/8/2021	18.5	92	0
18/8/2021	18.5	92	0
18/8/2021	18.6	92	0
18/8/2021	18.6	92	0
18/8/2021	18.6	92	0
19/8/2021	18.6	92	0
19/8/2021	18.6	92	0
19/8/2021	18.6	92	0
19/8/2021	18.6	92	0
19/8/2021	18.6	92	0
19/8/2021	18.5	92	0
19/8/2021	18.5	92	0
19/8/2021	18.5	92	0
19/8/2021	18.5	92	0
19/8/2021	18.4	92	0
19/8/2021	18.4	92	3.54
19/8/2021	18.5	93	26.87
19/8/2021	18.5	93	37.82
19/8/2021	18.6	93	68.3
19/8/2021	18.9	93	109.36
19/8/2021	19.2	92	118.04
19/8/2021	19.6	92	137.71
19/8/2021	20	91	92.71
19/8/2021	20.2	91	169.54
19/8/2021	20.5	91	287.28
19/8/2021	21.2	90	659.93
19/8/2021	22.3	89	373.52
19/8/2021	23.2	89	286.32
19/8/2021	23.7	85	579.34
19/8/2021	24.7	81	313.11
19/8/2021	25.4	76	373.13
19/8/2021	26.2	71	520.45
19/8/2021	26.9	70	1045.86
19/8/2021	28.1	64	1053.76
19/8/2021	29.3	62	210.84
19/8/2021	30.1	57	1126.56
19/8/2021	31.2	54	842
19/8/2021	31.3	54	678.36
19/8/2021	31.5	52	1138.94
19/8/2021	32	49	991.34
19/8/2021	32.3	48	1164.27
19/8/2021	32.6	48	312.21
19/8/2021	32.6	47	541.02
19/8/2021	32.3	47	919.95
19/8/2021	31.9	45	165.9
19/8/2021	31.8	45	193.08
19/8/2021	33.5	43	280.94
19/8/2021	35	41	720.11
19/8/2021	34.9	39	576.54
19/8/2021	33.1	40	108.74
19/8/2021	31.2	43	121.12
19/8/2021	29.7	47	80.61
19/8/2021	27.9	50	75.5
19/8/2021	26.4	53	42.32
19/8/2021	25.3	56	32.22
19/8/2021	24.4	59	6.51
19/8/2021	23.7	62	0
19/8/2021	22.9	63	0
19/8/2021	22.2	66	0
19/8/2021	21.5	69	0
19/8/2021	21	70	0
19/8/2021	20.6	72	0
19/8/2021	20.3	74	0
19/8/2021	20	75	0
19/8/2021	19.8	77	0
19/8/2021	19.6	78	0
19/8/2021	19.5	79	0
19/8/2021	19.4	80	0
19/8/2021	19.6	81	0
19/8/2021	19.7	81	0
19/8/2021	19.9	82	0
19/8/2021	20.1	81	0
19/8/2021	20.2	81	0
19/8/2021	20.3	82	0
19/8/2021	20.4	82	0
19/8/2021	20.4	82	0
19/8/2021	20.4	82	0
20/8/2021	20.4	82	0
20/8/2021	20.4	82	0
20/8/2021	20.5	82	0
20/8/2021	20.5	83	0
20/8/2021	20.5	83	0
20/8/2021	20.5	83	0
20/8/2021	20.5	83	0
20/8/2021	20.5	83	0
20/8/2021	20.5	83	0
20/8/2021	20.5	83	0
20/8/2021	20.5	84	0
20/8/2021	20.5	84	3.15
20/8/2021	20.6	84	20.4
20/8/2021	20.7	85	53.03
20/8/2021	21.1	84	67.87
20/8/2021	21.3	84	66.57
20/8/2021	21.7	84	81.45
20/8/2021	21.9	83	155.7
20/8/2021	22.4	81	97.42
20/8/2021	22.7	80	89.69
20/8/2021	23	80	148.92
20/8/2021	23.4	79	195.32
20/8/2021	23.9	77	264.64
20/8/2021	24.6	74	303.36
20/8/2021	25.2	72	354.02
20/8/2021	25.4	71	418.85
20/8/2021	26.5	68	726.22
20/8/2021	27.3	66	980.75
20/8/2021	28.3	63	348.02
20/8/2021	28.5	62	236
20/8/2021	28.4	62	257.18
20/8/2021	28.6	61	361.36
20/8/2021	29	59	218.4
20/8/2021	29.3	59	1106.22
20/8/2021	31	53	286.94
20/8/2021	31.1	52	200.64
20/8/2021	30.9	53	289.29
20/8/2021	30.9	52	236.9
20/8/2021	30.5	51	434.43
20/8/2021	30	52	234.26
20/8/2021	30.5	51	179.18
20/8/2021	30.7	51	279.71
20/8/2021	31.8	49	502.57
20/8/2021	31.2	49	438.58
20/8/2021	30.7	51	197.78
20/8/2021	31.1	50	221.82
20/8/2021	30.6	51	86.88
20/8/2021	28.8	53	63.19
20/8/2021	27.4	56	45.64
20/8/2021	26.3	59	28.84
20/8/2021	25.3	62	8.31
20/8/2021	24.3	64	0
20/8/2021	23.3	68	0
20/8/2021	22.5	69	0
20/8/2021	21.8	72	0
20/8/2021	21.3	72	0
20/8/2021	20.9	74	0
20/8/2021	20.5	74	0
20/8/2021	20.1	75	0
20/8/2021	19.8	76	0
20/8/2021	19.5	77	0
20/8/2021	19.2	77	0
20/8/2021	18.9	79	0
20/8/2021	18.6	80	0
20/8/2021	18.4	81	0
20/8/2021	18.3	82	0
20/8/2021	18.1	82	0
20/8/2021	18.1	82	0
20/8/2021	18	83	0
20/8/2021	18	84	0
20/8/2021	18	84	0
20/8/2021	17.9	84	0
20/8/2021	17.8	84	0
20/8/2021	17.6	85	0
20/8/2021	17.5	85	0
20/8/2021	17.4	85	0
20/8/2021	17.3	85	0
20/8/2021	17.2	86	0
20/8/2021	17.2	86	0
20/8/2021	17.4	87	0
20/8/2021	17.4	87	0
20/8/2021	17.5	88	4.54
20/8/2021	17.7	88	16.15
20/8/2021	18.1	89	26.99
20/8/2021	18.5	91	54.63
20/8/2021	19	91	70.88
20/8/2021	19.6	91	113.33
20/8/2021	20.4	90	148.53
20/8/2021	21.1	89	151.1
20/8/2021	21.8	87	142.53
20/8/2021	22.5	83	134.4
20/8/2021	22.7	81	137.21
20/8/2021	23	80	265.64
20/8/2021	24.1	77	768.81
20/8/2021	25.4	74	815.1
20/8/2021	26.6	71	892.38
20/8/2021	28.3	66	920.96
20/8/2021	29.8	62	1004.79
20/8/2021	30.8	57	986.63
20/8/2021	30.9	55	1009.66
20/8/2021	31.4	52	1012.86
20/8/2021	31.9	52	446.76
20/8/2021	32.1	50	266.21
20/8/2021	31.9	50	604.06
20/8/2021	32.1	49	412.18
20/8/2021	32.5	48	210.17
20/8/2021	31.5	49	986.18
20/8/2021	32	49	1019.47
20/8/2021	33.2	46	606.13
20/8/2021	33.5	45	289.07
20/8/2021	32.7	45	814.37
20/8/2021	32.3	46	179.4
20/8/2021	32.5	47	180.69
20/8/2021	32.9	44	582.93
20/8/2021	32.8	44	219.3
20/8/2021	31.8	45	142.19
20/8/2021	30.6	48	81.17
20/8/2021	30.4	50	150.66
20/8/2021	29.9	51	66.76
20/8/2021	28.4	52	55.55
20/8/2021	26.8	55	40.84
20/8/2021	25.5	58	26.68
20/8/2021	24.9	61	6.03
20/8/2021	23.8	63	0
20/8/2021	22.7	63	0
20/8/2021	21.9	66	0
20/8/2021	21.2	68	0
20/8/2021	20.7	71	0
20/8/2021	20.3	72	0
20/8/2021	20	73	0
20/8/2021	19.7	75	0
20/8/2021	19.3	76	0
20/8/2021	19.1	77	0
20/8/2021	18.9	79	0
20/8/2021	18.7	80	0
20/8/2021	18.5	81	0
20/8/2021	18.3	82	0
20/8/2021	18.1	82	0
20/8/2021	17.9	81	0
20/8/2021	17.7	81	0
20/8/2021	17.6	82	0
20/8/2021	17.4	82	0
20/8/2021	17.3	83	0
20/8/2021	17.2	83	0
22/8/2021	17.1	83	0
22/8/2021	16.9	85	0
22/8/2021	16.8	85	0
22/8/2021	16.7	85	0
22/8/2021	16.6	86	0
22/8/2021	16.5	86	0
22/8/2021	16.5	86	0
22/8/2021	16.5	87	0
22/8/2021	16.4	87	0
22/8/2021	16.4	87	5.47
22/8/2021	16.5	88	23.11
22/8/2021	16.6	88	31.73
22/8/2021	16.9	89	40.1
22/8/2021	17.3	88	45.83
22/8/2021	17.7	89	51.18
22/8/2021	18.1	91	57.46
22/8/2021	18.8	92	65.9
22/8/2021	19.5	91	154.19
22/8/2021	20.4	91	163.21
22/8/2021	21.5	89	495.06
22/8/2021	22.9	84	655.22
22/8/2021	24.5	78	761.13
22/8/2021	26.3	72	845.08
22/8/2021	28	67	903.14
22/8/2021	29.3	62	937.43
22/8/2021	30.2	56	982.43
22/8/2021	31.2	52	992.8
22/8/2021	31.9	51	1007.53
22/8/2021	32.7	49	1042.61
22/8/2021	33.1	46	1068.9
22/8/2021	33.5	45	1082.34
22/8/2021	34.8	43	1109.47
22/8/2021	35.7	40	1101.68
22/8/2021	35.9	40	1082.74
22/8/2021	35.9	38	1081.95
22/8/2021	36.3	36	1056.45
22/8/2021	35.8	36	187.36
22/8/2021	34.7	36	121.24
22/8/2021	33.7	38	936.76
22/8/2021	32.9	39	104.54
22/8/2021	32.9	40	143.82
22/8/2021	34	38	543.87
22/8/2021	35.5	36	694.17
22/8/2021	35.9	35	625.41
22/8/2021	34.6	36	91.93
22/8/2021	35.3	35	462.17
22/8/2021	34.1	36	52.66
22/8/2021	31.4	39	38.38
22/8/2021	29.1	44	29.82
22/8/2021	27.6	48	21.82
22/8/2021	26.4	51	6.3
22/8/2021	25.5	53	0
22/8/2021	24.5	57	0
22/8/2021	23.5	60	0
22/8/2021	22.7	61	0
22/8/2021	21.9	64	0
22/8/2021	21.3	66	0
22/8/2021	20.9	69	0
22/8/2021	20.5	70	0
22/8/2021	20.2	70	0
22/8/2021	20	71	0
22/8/2021	19.9	74	0
22/8/2021	19.7	75	0
22/8/2021	19.6	76	0
22/8/2021	19.4	77	0
22/8/2021	19.2	78	0
22/8/2021	19	79	0
22/8/2021	18.9	81	0
22/8/2021	18.8	82	0
22/8/2021	18.7	82	0
22/8/2021	18.6	82	0
22/8/2021	18.5	83	0
23/8/2021	18.4	83	0
23/8/2021	18.3	84	0
23/8/2021	18.1	84	0
23/8/2021	18	84	0
23/8/2021	17.9	83	0
23/8/2021	17.7	84	0
23/8/2021	17.6	84	0
23/8/2021	17.5	84	0
23/8/2021	17.4	84	0
23/8/2021	17.3	85	5.54
23/8/2021	17.4	85	24.71
23/8/2021	17.5	86	34.62
23/8/2021	17.9	87	44.1
23/8/2021	18.3	88	55.31
23/8/2021	18.7	90	69.84
23/8/2021	19.2	89	72.05
23/8/2021	19.8	91	88.34
23/8/2021	20.6	90	164.16
23/8/2021	21.6	88	193.58
23/8/2021	22.8	84	522.19
23/8/2021	24.3	78	661.5
23/8/2021	25.5	74	796.89
23/8/2021	27.8	68	868.39
23/8/2021	29.3	61	924.99
23/8/2021	30.4	58	963.21
23/8/2021	31.2	53	992.18
23/8/2021	32	51	1001.43
23/8/2021	32.7	50	1054.05
23/8/2021	33.3	48	1063.96
23/8/2021	34.1	45	1092.77
23/8/2021	34.6	43	1080.33
23/8/2021	34.7	41	1103.53
23/8/2021	35.1	37	1105.66
23/8/2021	35.6	35	1107.22
23/8/2021	36.1	33	1079.49
23/8/2021	36.5	32	1081.11
23/8/2021	36	32	1030.73
23/8/2021	35.1	32	139.22
23/8/2021	34.4	34	1045.86
23/8/2021	34	33	190.27
23/8/2021	33.9	34	185.73
23/8/2021	35.1	31	617.9
23/8/2021	34.8	31	503.25
23/8/2021	34.6	31	233.65
23/8/2021	33.2	33	144.66
23/8/2021	32.2	33	124.99
23/8/2021	30.7	41	85.2
23/8/2021	29.1	45	71.13
23/8/2021	27.9	50	36.29
23/8/2021	26.5	52	19.97
23/8/2021	25.6	55	3.85
23/8/2021	25.1	56	0
23/8/2021	24.5	59	0
23/8/2021	23.7	62	0
23/8/2021	23.2	63	0
23/8/2021	22.7	63	0
23/8/2021	22.4	64	0
23/8/2021	22.3	66	0
23/8/2021	22	68	0
23/8/2021	21.7	69	0
23/8/2021	21.5	70	0
23/8/2021	21.2	70	0
23/8/2021	21.1	71	0
23/8/2021	20.7	73	0
23/8/2021	20.5	74	0
23/8/2021	20.4	75	0
23/8/2021	20.2	75	0
23/8/2021	20.2	76	0
23/8/2021	20.2	77	0
23/8/2021	20.2	78	0
23/8/2021	20.3	79	0
23/8/2021	20.3	80	0
24/8/2021	20.3	80	0
24/8/2021	20.3	80	0
24/8/2021	20.3	81	0
24/8/2021	20.4	81	0
24/8/2021	20.5	82	0
24/8/2021	20.6	82	0
24/8/2021	20.6	83	0
24/8/2021	20.6	83	0
24/8/2021	20.6	83	0
24/8/2021	20.6	84	2.46
24/8/2021	20.7	84	24.16
24/8/2021	20.9	84	52.29
24/8/2021	21.2	84	47.37
24/8/2021	21.6	84	50.26
24/8/2021	21.8	84	61.9
24/8/2021	22.1	82	50.26
24/8/2021	22.2	82	53.58
24/8/2021	22.3	81	57.34
24/8/2021	22.4	81	71.25
24/8/2021	22.6	81	126.73
24/8/2021	23.1	83	184.61
24/8/2021	24.1	81	284.36
24/8/2021	24.9	78	197.78
24/8/2021	25.4	76	132.39
24/8/2021	25.3	74	110.2
24/8/2021	25.1	74	156.88
24/8/2021	25.1	74	175.2
24/8/2021	25.3	74	147.07
24/8/2021	25.3	74	222.61
24/8/2021	25.3	73	260.71
24/8/2021	25.4	74	237.46
24/8/2021	26.2	72	212.13
24/8/2021	26.2	73	221.54
24/8/2021	26.3	73	256.96
24/8/2021	26.5	72	147.57
24/8/2021	26.2	71	47.61
24/8/2021	25.3	73	90.64
24/8/2021	25.1	74	161.36
24/8/2021	24.8	77	84.42
24/8/2021	24.3	78	37.02
24/8/2021	23.8	80	46.32
24/8/2021	23.4	81	90.92
24/8/2021	23.3	82	50.69
24/8/2021	23	82	53.95
24/8/2021	22.8	82	21.76
24/8/2021	22.6	82	18.12
24/8/2021	22.3	83	7.69
24/8/2021	22.2	83	3.08
24/8/2021	22.1	84	0
24/8/2021	22.1	84	20.46
24/8/2021	22.1	84	1.15
24/8/2021	22.2	85	0
24/8/2021	22.2	85	0
24/8/2021	22.2	86	0
24/8/2021	22.3	86	0
24/8/2021	22.3	86	0
24/8/2021	22.3	86	0
24/8/2021	22.3	87	0
24/8/2021	22.3	87	0
24/8/2021	22.4	87	0
24/8/2021	22.5	87	0
24/8/2021	22.5	88	0
24/8/2021	22.5	88	0
24/8/2021	22.6	88	0
24/8/2021	22.6	88	0
24/8/2021	22.6	88	0
24/8/2021	22.6	88	0
24/8/2021	22.7	88	0
24/8/2021	22.7	88	0
24/8/2021	22.7	88	0
24/8/2021	22.8	89	0
24/8/2021	22.8	89	0
25/8/2021	22.9	89	0
25/8/2021	22.9	89	0
25/8/2021	22.9	89	0
25/8/2021	22.9	89	0
25/8/2021	22.9	89	0
25/8/2021	22.8	89	0
25/8/2021	22.7	89	0
25/8/2021	22.7	89	0
25/8/2021	22.6	89	0
25/8/2021	22.6	89	1.69
25/8/2021	22.7	89	35.67
25/8/2021	22.9	89	39.92
25/8/2021	23	92	71.81
25/8/2021	23.2	92	44.54
25/8/2021	23.3	92	58.14
25/8/2021	23.4	92	35.12
25/8/2021	23.4	92	96.47
25/8/2021	23.5	92	79.66
25/8/2021	23.7	92	197.11
25/8/2021	24.1	91	202.94
25/8/2021	24.5	91	192.07
25/8/2021	24.8	91	206.92
25/8/2021	25.1	89	219.81
25/8/2021	25.2	87	204.34
25/8/2021	25.2	86	289.63
25/8/2021	26.2	84	340.01
25/8/2021	26.5	81	227.93
25/8/2021	26.3	80	265.81
25/8/2021	26.3	79	164.89
25/8/2021	26	79	239.53
25/8/2021	25.2	81	155.64
25/8/2021	25.1	82	232.75
25/8/2021	24.8	83	167.69
25/8/2021	24.6	84	79.26
25/8/2021	24.3	84	68.11
25/8/2021	23.9	85	128.35
25/8/2021	23.8	86	182.93
25/8/2021	23.8	87	104.76
25/8/2021	23.8	87	90.75
25/8/2021	23.7	88	119.39
25/8/2021	23.8	88	97.25
25/8/2021	23.8	89	49.03
25/8/2021	23.6	88	119.78
25/8/2021	23.7	89	127.85
25/8/2021	23.8	89	150.77
25/8/2021	24	89	45.46
25/8/2021	23.8	89	18.93
25/8/2021	23.7	89	19.42
25/8/2021	23.6	89	7.96
25/8/2021	23.4	89	4.78
25/8/2021	23.3	89	0
25/8/2021	23.1	89	0
25/8/2021	23	90	0
25/8/2021	22.9	89	0
25/8/2021	22.7	89	0
25/8/2021	22.6	89	0
25/8/2021	22.6	89	0
25/8/2021	22.5	89	0
25/8/2021	22.3	89	0
25/8/2021	22.1	89	0
25/8/2021	21.9	90	0
25/8/2021	21.8	90	0
25/8/2021	21.8	90	0
25/8/2021	21.7	90	0
25/8/2021	21.6	90	0
25/8/2021	21.5	90	0
25/8/2021	21.3	90	0
25/8/2021	21.2	90	0
25/8/2021	21.1	90	0
25/8/2021	21	90	0
25/8/2021	20.9	91	0
25/8/2021	20.7	91	0
26/8/2021	20.5	91	0
26/8/2021	20.3	91	0
26/8/2021	20.2	91	0
26/8/2021	20.1	91	0
26/8/2021	20.1	91	0
26/8/2021	20.1	91	0
26/8/2021	20.1	91	0
26/8/2021	20	91	0
26/8/2021	20	91	0
26/8/2021	19.7	92	2.62
26/8/2021	19.6	92	3.69
26/8/2021	19.4	92	20.53
26/8/2021	19.3	92	38.13
26/8/2021	19.5	92	39.36
26/8/2021	19.8	93	43.8
26/8/2021	20.1	92	53.52
26/8/2021	20.5	92	60.3
26/8/2021	21.1	92	153.57
26/8/2021	21.8	92	202.71
26/8/2021	22.7	92	502.46
26/8/2021	23.8	94	638.69
26/8/2021	25.1	91	764.83
26/8/2021	26.3	86	851.08
26/8/2021	28	81	217.23
26/8/2021	28.6	77	871.87
26/8/2021	29	73	268.56
26/8/2021	30	67	1032.75
26/8/2021	30.5	65	1076.4
26/8/2021	31.1	60	1084.03
26/8/2021	31.8	58	1045.53
26/8/2021	32.9	55	1103.92
26/8/2021	33.7	53	1090.02
26/8/2021	34	50	1074.05
26/8/2021	34.7	50	1088.56
26/8/2021	35.7	47	1090.25
26/8/2021	36.5	42	1051.02
26/8/2021	35.9	41	946.28
26/8/2021	35.1	41	164.83
26/8/2021	34.2	41	630.56
26/8/2021	33.7	44	197.39
26/8/2021	33.7	44	144.1
26/8/2021	35.1	41	293.5
26/8/2021	34	43	660.99
26/8/2021	33.2	45	409.83
26/8/2021	32.8	48	105.6
26/8/2021	33.4	48	152.39
26/8/2021	32.2	48	119.89
26/8/2021	30.9	52	58.76
26/8/2021	29.6	54	36.72
26/8/2021	28.4	55	59.25
26/8/2021	27.6	58	20.28
26/8/2021	26.6	60	0
26/8/2021	25.5	63	0
26/8/2021	25.2	66	0
26/8/2021	24.4	69	0
26/8/2021	23.7	72	0
26/8/2021	23.1	73	0
26/8/2021	22.7	73	0
26/8/2021	22.4	74	0
26/8/2021	22.1	75	0
26/8/2021	21.8	77	0
26/8/2021	21.7	78	0
26/8/2021	21.5	79	0
26/8/2021	21.3	79	0
26/8/2021	21.2	80	0
26/8/2021	21.1	81	0
26/8/2021	21	81	0
26/8/2021	20.9	83	0
26/8/2021	20.7	83	0
26/8/2021	20.5	84	0
26/8/2021	20.4	84	0
26/8/2021	20.3	85	0
27/8/2021	20.1	85	0
27/8/2021	20	85	0
27/8/2021	20	86	0
27/8/2021	19.8	87	0
27/8/2021	19.7	87	0
27/8/2021	19.7	88	0
27/8/2021	19.6	88	0
27/8/2021	19.5	88	0
27/8/2021	19.3	88	0
27/8/2021	19.2	88	5.54
27/8/2021	19.3	88	25.94
27/8/2021	19.5	89	39.98
27/8/2021	19.9	90	80.5
27/8/2021	20.5	90	66.94
27/8/2021	20.9	91	87.67
27/8/2021	21.5	90	162.31
27/8/2021	22.2	89	156.31
27/8/2021	22.9	89	195.43
27/8/2021	23.5	90	303.97
27/8/2021	24.5	87	325.72
27/8/2021	25.4	84	294.5
27/8/2021	26.2	80	621.32
27/8/2021	27.3	76	488.62
27/8/2021	28.3	74	712.04
27/8/2021	29.5	69	603.83
27/8/2021	30.4	65	858.64
27/8/2021	31.4	61	791.51
27/8/2021	32.2	58	520.67
27/8/2021	32.4	57	333.28
27/8/2021	32.1	56	415.04
27/8/2021	32.1	57	392.91
27/8/2021	32.3	55	647.15
27/8/2021	33.1	54	1025.69
27/8/2021	34.4	52	591.34
27/8/2021	34.3	51	396.44
27/8/2021	33.5	51	287.56
27/8/2021	32.5	50	256.45
27/8/2021	31.9	53	301.9
27/8/2021	32.1	53	675.45
27/8/2021	32.7	51	283.3
27/8/2021	33.1	52	275.62
27/8/2021	34.1	51	339.61
27/8/2021	34.6	49	201.87
27/8/2021	34.3	50	330.31
27/8/2021	33.6	51	145.72
27/8/2021	32.3	50	118.83
27/8/2021	30.8	53	128.52
27/8/2021	29.8	54	59.56
27/8/2021	28.6	56	67.56
27/8/2021	27.6	59	51.25
27/8/2021	26.7	61	21.14
27/8/2021	26.4	64	0
27/8/2021	25.5	68	0
27/8/2021	25	70	0
27/8/2021	24.4	71	0
27/8/2021	23.9	74	0
27/8/2021	23.3	75	0
27/8/2021	22.8	75	0
27/8/2021	22.6	76	0
27/8/2021	22.2	77	0
27/8/2021	21.9	79	0
27/8/2021	21.8	80	0
27/8/2021	21.7	81	0
27/8/2021	21.5	82	0
27/8/2021	21.5	82	0
27/8/2021	21.3	83	0
27/8/2021	21.2	83	0
27/8/2021	21.2	84	0
27/8/2021	21.1	84	0
27/8/2021	21	85	0
27/8/2021	21	85	0
27/8/2021	20.9	86	0
28/8/2021	20.7	87	0
28/8/2021	20.6	87	0
28/8/2021	20.6	87	0
28/8/2021	20.5	87	0
28/8/2021	20.4	88	0
28/8/2021	20.3	88	0
28/8/2021	20.3	88	0
28/8/2021	20.2	88	0
28/8/2021	20.1	88	0
28/8/2021	20	88	5.12
28/8/2021	20	89	20.16
28/8/2021	20.3	90	39.73
28/8/2021	20.8	90	66.02
28/8/2021	21.3	90	91.48
28/8/2021	21.9	90	92.38
28/8/2021	22.3	90	102.41
28/8/2021	22.9	90	111.82
28/8/2021	23.4	92	179.63
28/8/2021	24.4	91	251.13
28/8/2021	25.4	88	425.75
28/8/2021	26.5	84	588.48
28/8/2021	28.2	79	727.85
28/8/2021	29.9	74	801.15
28/8/2021	31	66	868.56
28/8/2021	32	61	926.28
28/8/2021	33.1	56	1000.08
28/8/2021	34.2	53	1077.69
28/8/2021	34.7	51	1115.91
28/8/2021	35.4	48	1037.35
28/8/2021	35.8	49	856.23
28/8/2021	35.3	45	343.93
28/8/2021	35.1	45	444.01
28/8/2021	35.8	43	1137.09
28/8/2021	36.8	41	628.99
28/8/2021	36.7	40	736.7
28/8/2021	36.8	39	974.19
28/8/2021	36.8	39	369.71
28/8/2021	36.5	37	456.57
28/8/2021	35.8	38	794.53
28/8/2021	35.3	39	241.72
28/8/2021	35.3	40	232.19
28/8/2021	35.8	40	556.31
28/8/2021	36.4	39	459.42
28/8/2021	36.1	38	439.36
28/8/2021	34.8	40	172.12
28/8/2021	35.2	40	216.89
28/8/2021	34.3	41	103.98
28/8/2021	32.4	44	71.81
28/8/2021	30.9	50	67.5
28/8/2021	30	51	36.84
28/8/2021	29	54	16.46
28/8/2021	27.9	59	0
28/8/2021	26.4	61	0
28/8/2021	25.6	65	0
28/8/2021	25.1	66	0
28/8/2021	24.7	69	0
28/8/2021	24.3	71	0
28/8/2021	23.9	72	0
28/8/2021	23.5	74	0
28/8/2021	23.1	74	0
28/8/2021	22.8	75	0
28/8/2021	22.6	75	0
28/8/2021	22.3	76	0
28/8/2021	22	77	0
28/8/2021	21.9	79	0
28/8/2021	21.8	79	0
28/8/2021	21.8	80	0
28/8/2021	21.8	81	0
28/8/2021	21.7	81	0
28/8/2021	21.5	82	0
28/8/2021	21.5	82	0
28/8/2021	21.3	83	0
29/8/2021	21.3	83	0
29/8/2021	21.3	84	0
29/8/2021	21.2	84	0
29/8/2021	21.2	84	0
29/8/2021	21.3	85	0
29/8/2021	21.4	85	0
29/8/2021	21.5	85	0
29/8/2021	21.6	85	0
29/8/2021	21.7	85	0
29/8/2021	21.8	85	3.62
29/8/2021	21.8	85	18.86
29/8/2021	22	84	18.8
29/8/2021	22.2	84	21.7
29/8/2021	22.5	84	25.88
29/8/2021	22.7	84	34.69
29/8/2021	22.9	84	33.52
29/8/2021	23	84	63.13
29/8/2021	23.3	84	127.01
29/8/2021	23.8	83	136.42
29/8/2021	24.4	81	134.74
29/8/2021	24.7	80	105.54
29/8/2021	24.8	79	147.35
29/8/2021	25	77	230.68
29/8/2021	25.2	76	178.62
29/8/2021	25.4	76	361.75
29/8/2021	26.2	73	182.09
29/8/2021	26.4	72	158.67
29/8/2021	26.3	72	263.01
29/8/2021	26.7	71	332.89
29/8/2021	27.6	69	162.93
29/8/2021	27.5	68	107.17
29/8/2021	26.4	69	148.58
29/8/2021	25.4	72	45.95
29/8/2021	24.6	74	111.32
29/8/2021	24.1	76	136.48
29/8/2021	23.7	79	56.29
29/8/2021	23.4	80	38.56
29/8/2021	22.6	79	30.25
29/8/2021	21.9	80	52.48
29/8/2021	21.6	81	62.57
29/8/2021	21.3	82	29.88
29/8/2021	21.2	83	2.92
29/8/2021	21	83	33.08
29/8/2021	20.9	85	52.11
29/8/2021	21	85	64.97
29/8/2021	21.1	85	46.2
29/8/2021	21.2	86	18.31
29/8/2021	21.1	86	0
29/8/2021	21	86	0
29/8/2021	20.9	87	0
29/8/2021	20.9	87	0
29/8/2021	20.7	88	0
29/8/2021	20.6	88	0
29/8/2021	20.4	88	0
29/8/2021	20.4	88	0
29/8/2021	20.4	89	0
29/8/2021	20.5	90	0
29/8/2021	20.6	90	0
29/8/2021	20.6	90	0
29/8/2021	20.7	90	0
29/8/2021	20.8	90	0
29/8/2021	20.9	90	0
29/8/2021	21.1	90	0
29/8/2021	21.6	90	0
29/8/2021	22.2	90	0
29/8/2021	22.3	90	0
29/8/2021	22.5	90	0
29/8/2021	22.5	90	0
29/8/2021	22.6	90	0
29/8/2021	22.6	90	0
29/8/2021	22.3	90	0
29/8/2021	21.9	90	0
30/8/2021	21.7	90	0
30/8/2021	21.5	90	0
30/8/2021	21.3	90	0
30/8/2021	21.2	90	0
30/8/2021	21.1	90	0
30/8/2021	21	90	0
30/8/2021	21	90	0
30/8/2021	21	90	0
30/8/2021	21	90	0
30/8/2021	20.9	91	0
30/8/2021	21	90	0
30/8/2021	21	90	2.77
30/8/2021	21.1	90	0
30/8/2021	21.1	90	19.48
30/8/2021	21.2	91	15.85
30/8/2021	21.2	91	17.14
30/8/2021	21.2	91	47.86
30/8/2021	21.2	91	52.54
30/8/2021	21.4	91	183.89
30/8/2021	22.1	90	422.55
30/8/2021	23.1	93	671.36
30/8/2021	23.9	90	222.38
30/8/2021	25	83	894.39
30/8/2021	26.2	76	967.24
30/8/2021	26.4	73	931.27
30/8/2021	27.3	70	1021.32
30/8/2021	27.8	68	1020.03
30/8/2021	28.3	65	533.06
30/8/2021	28.9	64	288.84
30/8/2021	29.2	61	534.63
30/8/2021	29.3	59	1065.25
30/8/2021	30.1	54	1069.06
30/8/2021	30.6	52	1068.22
30/8/2021	30.9	51	1071.7
30/8/2021	31.5	49	1081.9
30/8/2021	32.3	48	1074.5
30/8/2021	32.1	46	108.68
30/8/2021	31.2	45	96.97
30/8/2021	30.5	47	130.09
30/8/2021	29.9	49	100.45
30/8/2021	29.7	49	115.3
30/8/2021	30.3	47	272.31
30/8/2021	30.7	45	157.32
30/8/2021	29.1	45	130.76
30/8/2021	27.8	48	699.71
30/8/2021	28.4	48	395.82
30/8/2021	30.1	45	54.08
30/8/2021	28	46	62.76
30/8/2021	26.3	50	58.88
30/8/2021	25.1	52	38.81
30/8/2021	24.5	55	18.93
30/8/2021	23.7	58	0
30/8/2021	23	60	0
30/8/2021	22.3	60	0
30/8/2021	21.9	63	0
30/8/2021	21.6	64	0
30/8/2021	21.2	66	0
30/8/2021	20.7	69	0
30/8/2021	20.2	71	0
30/8/2021	19.8	73	0
30/8/2021	19.6	74	0
30/8/2021	19.3	74	0
30/8/2021	19.2	76	0
30/8/2021	19.1	77	0
30/8/2021	19.1	78	0
30/8/2021	19.1	78	0
30/8/2021	19	79	0
30/8/2021	18.8	81	0
30/8/2021	18.8	82	0
30/8/2021	18.9	82	0
30/8/2021	19	81	0
30/8/2021	19	82	0

## Sheet: Soil water content
day	control. Soil water content (m3/m3, %)	Drought. soil water content(m3/m3, %)
1/8/2021	24.6	18.414
1/8/2021	24.52	18.271
1/8/2021	24.52	18.105
1/8/2021	24.41	17.867
1/8/2021	24.41	17.677
1/8/2021	24.37	17.51
1/8/2021	24.41	17.391
1/8/2021	24.45	17.344
1/8/2021	24.45	17.296
1/8/2021	24.49	17.296
1/8/2021	24.49	17.368
1/8/2021	24.52	17.486
1/8/2021	24.52	17.582
1/8/2021	24.49	17.629
1/8/2021	24.37	17.582
1/8/2021	24.25	17.463
1/8/2021	24.14	17.272
1/8/2021	24.06	17.034
1/8/2021	23.87	16.749
1/8/2021	23.3	16.439
1/8/2021	23.06	20.079
1/8/2021	23.23	21.127
1/8/2021	23.18	21.748
1/8/2021	23.27	21.652
1/8/2021	23.23	21.056
1/8/2021	23.18	20.293
1/8/2021	23.18	19.532
1/8/2021	23.18	18.747
1/8/2021	23.11	17.986
1/8/2021	23.15	15.819
1/8/2021	22.77	15.103
1/8/2021	22.62	14.409
1/8/2021	22.41	13.786
1/8/2021	22.77	13.209
1/8/2021	23.03	12.703
1/8/2021	23.15	12.389
1/8/2021	23.27	12.364
1/8/2021	23.3	12.823
1/8/2021	23.3	14.122
1/8/2021	23.35	15.724
1/8/2021	23.3	18.2
1/8/2021	23.23	20.222
1/8/2021	23.03	21.915
1/8/2021	22.66	24.05
1/8/2021	22.32	24.847
1/8/2021	22.11	23.978
1/8/2021	22.08	22.729
1/8/2021	22.08	21.461
5/8/2021	29.46	29.065
5/8/2021	29.35	27.85
5/8/2021	29.28	26.622
5/8/2021	29.22	25.477
5/8/2021	29.19	24.46
5/8/2021	29.14	23.593
5/8/2021	29.11	22.8
5/8/2021	29.11	22.082
5/8/2021	29.11	21.437
5/8/2021	29.11	20.841
5/8/2021	29.11	20.317
5/8/2021	29.11	19.912
5/8/2021	29.11	19.817
5/8/2021	29.08	20.246
5/8/2021	29.04	21.175
5/8/2021	29.01	22.513
5/8/2021	28.84	24.074
5/8/2021	28.68	25.695
5/8/2021	28.5	27.579
5/8/2021	28.3	28.791
5/8/2021	28.13	28.766
5/8/2021	28	28.122
5/8/2021	27.83	27.21
5/8/2021	27.73	26.256
5/8/2021	27.66	25.331
5/8/2021	27.59	24.532
5/8/2021	27.53	23.785
5/8/2021	27.49	22.705
5/8/2021	27.46	21.103
5/8/2021	27.39	19.651
5/8/2021	27.39	18.794
5/8/2021	27.36	18.39
5/8/2021	27.32	18.176
5/8/2021	27.29	18.057
5/8/2021	27.29	18.033
5/8/2021	27.26	18.033
5/8/2021	27.26	18.105
5/8/2021	27.22	18.247
5/8/2021	27.22	18.438
5/8/2021	27.12	18.771
5/8/2021	27.01	19.222
5/8/2021	26.84	19.817
5/8/2021	26.66	20.484
5/8/2021	26.53	21.294
5/8/2021	26.28	22.154
5/8/2021	26.04	22.561
5/8/2021	25.82	22.561
5/8/2021	25.67	22.369
10/8/2021	16.249	26.769
10/8/2021	15.843	25.525
10/8/2021	15.366	24.243
10/8/2021	14.912	21.223
10/8/2021	14.505	20.293
10/8/2021	14.17	19.436
10/8/2021	13.882	18.675
10/8/2021	13.642	18.033
10/8/2021	13.449	17.463
10/8/2021	13.257	16.963
10/8/2021	13.088	16.511
10/8/2021	12.968	16.058
10/8/2021	12.896	15.581
10/8/2021	12.847	15.199
10/8/2021	12.799	15.031
10/8/2021	12.751	15.199
10/8/2021	12.678	15.605
10/8/2021	12.582	16.177
10/8/2021	12.437	16.725
10/8/2021	12.34	17.153
15/8/2021	12.219	17.32
15/8/2021	12.122	17.368
15/8/2021	12.025	17.249
15/8/2021	11.953	17.058
15/8/2021	11.904	16.844
15/8/2021	11.856	16.63
15/8/2021	11.807	16.392
15/8/2021	11.783	16.225
15/8/2021	11.783	16.058
15/8/2021	11.759	15.939
15/8/2021	11.734	9.743
15/8/2021	11.734	9.624
15/8/2021	11.734	9.529
15/8/2021	11.734	9.433
15/8/2021	11.759	9.338
15/8/2021	11.856	9.266
15/8/2021	12.05	9.218
15/8/2021	12.389	9.194
15/8/2021	12.823	9.194
15/8/2021	13.353	9.266
15/8/2021	13.954	9.481
15/8/2021	14.529	9.958
15/8/2021	15.127	10.673
15/8/2021	15.7	11.386
15/8/2021	16.225	12.1
15/8/2021	16.606	12.837
15/8/2021	16.796	13.574
15/8/2021	16.82	14.217
15/8/2021	16.773	14.622
15/8/2021	16.63	14.693
15/8/2021	16.439	14.503
15/8/2021	16.177	14.217
20/8/2021	15.247	3.744
20/8/2021	15.485	4.317
20/8/2021	16.153	4.867
20/8/2021	17.249	5.37
20/8/2021	18.913	0.182
20/8/2021	20.603	0.062
20/8/2021	21.963	0.633
20/8/2021	22.8	1.875
20/8/2021	23.112	3.803
20/8/2021	23.088	3.042
20/8/2021	22.848	2.304
20/8/2021	22.465	1.612
20/8/2021	22.034	0.968
20/8/2021	21.533	0.369
20/8/2021	21.056	0.041
20/8/2021	20.603	0.13
20/8/2021	20.198	0.752
20/8/2021	19.793	1.899
20/8/2021	19.436	0.598
20/8/2021	19.103	0.775
20/8/2021	18.794	0.768
20/8/2021	18.557	0.768
20/8/2021	18.39	0.758
20/8/2021	18.271	0.758
20/8/2021	18.343	0.762
20/8/2021	18.58	0.768
20/8/2021	19.08	0.768
20/8/2021	20.055	0.775
20/8/2021	21.557	0.775
20/8/2021	22.992	0.781
20/8/2021	23.93	0.787
20/8/2021	24.412	0.787
20/8/2021	24.702	0.787
20/8/2021	24.677	0.787
20/8/2021	24.436	0.768
20/8/2021	24.05	0.758
20/8/2021	23.521	0.745
20/8/2021	22.92	0.725
20/8/2021	22.321	0.722
20/8/2021	21.724	0.752
20/8/2021	21.175	0.781
20/8/2021	20.674	0.81
20/8/2021	20.222	0.816
20/8/2021	19.77	0.816
20/8/2021	19.341	0.816
20/8/2021	18.913	0.835
20/8/2021	18.533	0.829
20/8/2021	18.271	0.829
20/8/2021	18.247	0.829
20/8/2021	18.533	0.822
20/8/2021	19.222	0.822
20/8/2021	20.293	0.829
20/8/2021	21.795	0.829
20/8/2021	23.352	0.829
20/8/2021	24.75	0.822
20/8/2021	25.695	0.816
20/8/2021	25.963	0.81
20/8/2021	25.72	0.81
20/8/2021	25.234	0.81
20/8/2021	24.629	0.81
20/8/2021	23.954	0.797
20/8/2021	23.256	0.797
20/8/2021	22.585	0.794
20/8/2021	21.939	0.794
20/8/2021	21.342	0.781
20/8/2021	20.793	0.781
20/8/2021	20.293	0.781
20/8/2021	19.77	0.781
20/8/2021	19.27	0.787
20/8/2021	18.818	0.781
20/8/2021	18.438	0.781
20/8/2021	18.129	0.775
20/8/2021	18.033	0.775
20/8/2021	18.271	0.775
20/8/2021	19.08	0.775
20/8/2021	20.913	0.781
20/8/2021	22.489	0.775
20/8/2021	24.171	0.781
20/8/2021	25.671	0.794
20/8/2021	26.671	1.122
20/8/2021	26.989	1.091
20/8/2021	26.744	1.069
20/8/2021	26.304	1.058
20/8/2021	25.768	1.053
20/8/2021	25.137	1.053
20/8/2021	24.412	1.047
20/8/2021	23.665	1.042
20/8/2021	22.896	1.036
20/8/2021	22.202	1.031
20/8/2021	21.533	1.031
20/8/2021	20.913	1.025
20/8/2021	20.341	1.031
20/8/2021	19.793	1.031
20/8/2021	19.27	1.031
20/8/2021	18.794	1.025
20/8/2021	18.414	1.025
20/8/2021	18.2	1.031
20/8/2021	18.319	1.031
20/8/2021	18.961	1.036
20/8/2021	20.007	1.036
20/8/2021	21.461	1.036
20/8/2021	22.872	1.042
20/8/2021	24.002	1.042
20/8/2021	24.677	1.042
20/8/2021	24.944	1.047
20/8/2021	24.944	1.047
20/8/2021	24.823	1.042
20/8/2021	24.629	1.042
20/8/2021	24.315	1.031
20/8/2021	23.978	1.02
20/8/2021	23.617	1.014
20/8/2021	23.208	1.014
20/8/2021	22.8	1.003
20/8/2021	22.417	1.009
20/8/2021	22.082	0.998
20/8/2021	21.724	0.998
20/8/2021	21.413	0.998
20/8/2021	21.079	0.998
20/8/2021	20.793	1.003
20/8/2021	20.507	1.009
20/8/2021	20.269	1.014
20/8/2021	20.031	1.025
20/8/2021	19.841	1.025
20/8/2021	19.698	1.036
20/8/2021	19.603	1.036
20/8/2021	19.532	1.042
20/8/2021	19.46	1.047
20/8/2021	19.436	1.053
20/8/2021	19.436	1.053
20/8/2021	19.413	1.058
20/8/2021	19.365	1.058
20/8/2021	19.294	1.025
20/8/2021	19.199	1.025
20/8/2021	19.08	1.009
20/8/2021	18.937	0.981
20/8/2021	18.818	0.969
20/8/2021	18.723	0.943
20/8/2021	18.604	0.92
20/8/2021	18.509	0.914
20/8/2021	18.438	0.908
20/8/2021	18.343	0.908
20/8/2021	18.271	0.914
20/8/2021	18.2	0.908
20/8/2021	18.152	0.914
25/8/2021	17.891	2.126
25/8/2021	17.891	2.122
25/8/2021	18.129	2.112
25/8/2021	18.58	2.104
25/8/2021	19.365	2.092
25/8/2021	20.46	2.078
25/8/2021	21.891	2.061
25/8/2021	23.136	2.038
25/8/2021	23.737	2.02
25/8/2021	23.713	1.999
25/8/2021	23.352	1.981
25/8/2021	22.824	1.972
25/8/2021	22.154	1.967
25/8/2021	21.437	1.963
25/8/2021	20.674	1.963
25/8/2021	19.912	1.958
25/8/2021	19.222	1.958
25/8/2021	18.557	1.958
25/8/2021	17.938	1.963
25/8/2021	17.368	1.958
25/8/2021	16.82	1.958
25/8/2021	16.32	1.958
25/8/2021	15.867	1.963
25/8/2021	15.533	1.958
25/8/2021	15.39	1.958
25/8/2021	15.629	1.954
25/8/2021	16.439	1.948
25/8/2021	17.653	1.945
25/8/2021	19.651	1.932
25/8/2021	21.867	1.913
25/8/2021	23.905	1.898
25/8/2021	25.234	1.895
25/8/2021	25.671	1.881
25/8/2021	25.525	1.881
25/8/2021	25.113	1.881
25/8/2021	24.581	1.885
25/8/2021	23.93	1.891
25/8/2021	23.16	1.891
25/8/2021	22.321	1.895
25/8/2021	21.485	1.895
25/8/2021	20.65	1.898
25/8/2021	19.865	1.898
25/8/2021	19.151	1.908
25/8/2021	18.461	1.908
25/8/2021	17.819	1.908
25/8/2021	17.225	1.913
25/8/2021	16.725	1.913
25/8/2021	16.415	1.917
25/8/2021	16.392	1.923
25/8/2021	16.796	1.923
25/8/2021	17.796	1.932
25/8/2021	19.103	1.904
25/8/2021	20.722	1.885
25/8/2021	22.657	1.853
25/8/2021	24.267	1.803
25/8/2021	25.234	1.769
25/8/2021	25.574	1.724
25/8/2021	25.501	1.671
25/8/2021	25.162	1.642
25/8/2021	24.702	1.629
25/8/2021	24.195	1.623
25/8/2021	23.665	1.629
25/8/2021	23.16	1.623
25/8/2021	22.681	1.629
25/8/2021	22.202	1.629
25/8/2021	21.7	1.634
25/8/2021	21.175	1.634
25/8/2021	20.65	1.638
25/8/2021	20.103	1.642
25/8/2021	19.555	1.648
25/8/2021	19.103	1.663
25/8/2021	18.699	1.663
30/8/2021	19.08	0.2303
30/8/2021	19.389	0.2274
30/8/2021	20.007	0.2257
30/8/2021	20.889	0.2245
30/8/2021	22.202	0.2237
30/8/2021	23.352	0.2229
30/8/2021	24.267	0.2224
30/8/2021	24.871	0.2219
30/8/2021	25.04	0.2219
30/8/2021	24.944	0.2216
30/8/2021	24.653	0.2216
30/8/2021	24.267	0.2216
30/8/2021	23.761	0.2216
30/8/2021	23.208	0.2211
30/8/2021	22.681	0.2211
30/8/2021	22.226	0.2208
30/8/2021	21.843	0.2203
30/8/2021	21.509	0.219
30/8/2021	21.175	0.2164
30/8/2021	20.841	0.2134
30/8/2021	20.507	0.21
30/8/2021	20.174	0.2073
30/8/2021	19.936	0.2038
30/8/2021	19.793	0.1999
30/8/2021	19.841	0.1963
30/8/2021	20.198	0.1926
30/8/2021	20.96	0.1908
30/8/2021	21.795	0.1891
30/8/2021	23.16	0.1872
30/8/2021	24.944	0.1859
30/8/2021	26.475	0.1853
30/8/2021	27.235	0.184
30/8/2021	27.308	0.184
30/8/2021	27.087	0.1836
30/8/2021	26.72	0.1836
30/8/2021	26.231	0.183
30/8/2021	25.598	0.1752
30/8/2021	24.895	0.1695
30/8/2021	24.171	0.1663
30/8/2021	23.497	0.1648
30/8/2021	22.848	0.1629
30/8/2021	22.25	0.1623
30/8/2021	21.724	0.1623
30/8/2021	21.246	0.1623
30/8/2021	20.841	0.1623
30/8/2021	20.46	0.1623
30/8/2021	20.15	0.1623
30/8/2021	19.912	0.1623
30/8/2021	19.77	0.1629
30/8/2021	19.77	0.1634
30/8/2021	19.984	0.1638
30/8/2021	20.341	0.1638
30/8/2021	20.722	0.1634
30/8/2021	20.984	0.1608
30/8/2021	21.151	0.1562
30/8/2021	21.246	0.1508
30/8/2021	21.318	0.1466
30/8/2021	21.318	0.1416
30/8/2021	21.27	0.1366
30/8/2021	21.175	0.1321
30/8/2021	21.056	0.1285
30/8/2021	20.913	0.1256
30/8/2021	20.722	0.1229
30/8/2021	20.531	0.1209
30/8/2021	20.341	0.1199
30/8/2021	20.15	0.1189
30/8/2021	19.96	0.1184
30/8/2021	19.77	0.1179
30/8/2021	19.579	0.1174
30/8/2021	19.365	0.1169
30/8/2021	19.175	0.1169
30/8/2021	19.032	0.1169

## Sheet: Shoot, Root
treatment	처리구	day	Shoot (g)	Root (g)
Control	1	1	107	92
Control	1	1	99	71
Control	1	1	106	94
Control	1	1	111	109
Control	1	1	112	108
Control	1	1	113	93
Control	1	1	110	66
Control	1	1	112	91
Control	1	1	114	82
Control	1	1	102	67
Control	1	1	109	74
Control	1	1	99	45
Control	1	1	107	79
Control	1	1	99	61
Control	1	1	111	66
Control	1	1	97	84
Control	1	1	98	65
Control	1	1	100	93
Control	1	1	84	104
Control	1	1	95	100
Control	1	5	111	98
Control	1	5	105	78
Control	1	5	117	89
Control	1	5	106	118
Control	1	5	106	92
Control	1	5	119	71
Control	1	5	112	92
Control	1	5	111	74
Control	1	5	111	88
Control	1	5	106	81
Control	1	5	116	53
Control	1	5	99	79
Control	1	5	108	81
Control	1	5	111	53
Control	1	5	106	60
Control	1	5	103	98
Control	1	5	95	81
Control	1	5	95	113
Control	1	5	84	79
Control	1	5	103	73
Control	1	10	110	89
Control	1	10	115	101
Control	1	10	104	99
Control	1	10	115	101
Control	1	10	110	84
Control	1	10	106	80
Control	1	10	128	81
Control	1	10	113	81
Control	1	10	119	99
Control	1	10	105	69
Control	1	10	112	65
Control	1	10	103	74
Control	1	10	112	58
Control	1	10	108	71
Control	1	10	110	67
Control	1	10	87	97
Control	1	10	101	84
Control	1	10	103	96
Control	1	10	91	103
Control	1	10	89	69
Control	1	15	109	104
Control	1	15	117	84
Control	1	15	117	100
Control	1	15	102	112
Control	1	15	114	79
Control	1	15	112	81
Control	1	15	125	62
Control	1	15	118	93
Control	1	15	116	103
Control	1	15	114	76
Control	1	15	112	72
Control	1	15	110	73
Control	1	15	111	56
Control	1	15	107	63
Control	1	15	111	71
Control	1	15	92	103
Control	1	15	87	92
Control	1	15	86	100
Control	1	15	95	73
Control	1	15	114	87
Control	1	20	122	94
Control	1	20	103	84
Control	1	20	104	114
Control	1	20	123	95
Control	1	20	114	99
Control	1	20	115	92
Control	1	20	121	70
Control	1	20	108	81
Control	1	20	126	90
Control	1	20	116	87
Control	1	20	104	71
Control	1	20	107	83
Control	1	20	123	65
Control	1	20	107	54
Control	1	20	114	62
Control	1	20	84	80
Control	1	20	95	95
Control	1	20	112	88
Control	1	20	97	97
Control	1	20	98	101
Control	1	25	123	117
Control	1	25	122	90
Control	1	25	118	86
Control	1	25	107	96
Control	1	25	101	97
Control	1	25	117	73
Control	1	25	126	82
Control	1	25	109	95
Control	1	25	119	106
Control	1	25	119	70
Control	1	25	112	46
Control	1	25	108	53
Control	1	25	95	72
Control	1	25	99	90
Control	1	25	96	75
Control	1	25	93	97
Control	1	25	102	86
Control	1	25	100	81
Control	1	25	87	109
Control	1	25	103	86
Control	1	30	103	90
Control	1	30	110	107
Control	1	30	116	104
Control	1	30	106	91
Control	1	30	136	94
Control	1	30	110	69
Control	1	30	124	81
Control	1	30	128	74
Control	1	30	127	94
Control	1	30	116	109
Control	1	30	100	84
Control	1	30	109	65
Control	1	30	97	40
Control	1	30	102	72
Control	1	30	107	74
Control	1	30	95	103
Control	1	30	99	74
Control	1	30	111	93
Control	1	30	80	103
Control	1	30	105	88
Drought	2	1	103	90
Drought	2	1	108	97
Drought	2	1	114	95
Drought	2	1	97	99
Drought	2	1	128	94
Drought	2	1	90	87
Drought	2	1	106	85
Drought	2	1	107	78
Drought	2	1	95	90
Drought	2	1	102	85
Drought	2	1	81	86
Drought	2	1	94	83
Drought	2	1	102	92
Drought	2	1	94	92
Drought	2	1	79	92
Drought	2	1	101	89
Drought	2	1	91	96
Drought	2	1	92	92
Drought	2	1	83	93
Drought	2	1	113	91
Drought	2	5	102	95
Drought	2	5	130	87
Drought	2	5	109	99
Drought	2	5	102	94
Drought	2	5	108	95
Drought	2	5	89	89
Drought	2	5	95	87
Drought	2	5	96	76
Drought	2	5	105	85
Drought	2	5	110	88
Drought	2	5	88	87
Drought	2	5	92	97
Drought	2	5	84	89
Drought	2	5	87	83
Drought	2	5	100	83
Drought	2	5	96	85
Drought	2	5	99	89
Drought	2	5	103	99
Drought	2	5	91	90
Drought	2	5	92	91
Drought	2	10	110	91
Drought	2	10	112	97
Drought	2	10	116	93
Drought	2	10	99	94
Drought	2	10	103	86
Drought	2	10	96	86
Drought	2	10	99	85
Drought	2	10	105	81
Drought	2	10	90	86
Drought	2	10	105	86
Drought	2	10	93	85
Drought	2	10	85	89
Drought	2	10	98	88
Drought	2	10	87	92
Drought	2	10	82	87
Drought	2	10	96	91
Drought	2	10	91	91
Drought	2	10	95	86
Drought	2	10	97	89
Drought	2	10	100	93
Drought	2	15	98	94
Drought	2	15	91	92
Drought	2	15	99	90
Drought	2	15	109	95
Drought	2	15	119	89
Drought	2	15	83	79
Drought	2	15	88	90
Drought	2	15	104	85
Drought	2	15	92	83
Drought	2	15	89	88
Drought	2	15	88	90
Drought	2	15	80	88
Drought	2	15	72	90
Drought	2	15	88	85
Drought	2	15	101	87
Drought	2	15	92	91
Drought	2	15	90	87
Drought	2	15	90	87
Drought	2	15	84	89
Drought	2	15	99	91
Drought	2	20	107	90
Drought	2	20	112	91
Drought	2	20	98	93
Drought	2	20	93	86
Drought	2	20	95	90
Drought	2	20	92	86
Drought	2	20	89	80
Drought	2	20	92	83
Drought	2	20	81	82
Drought	2	20	90	88
Drought	2	20	91	89
Drought	2	20	85	90
Drought	2	20	84	86
Drought	2	20	97	85
Drought	2	20	72	84
Drought	2	20	83	85
Drought	2	20	91	88
Drought	2	20	99	92
Drought	2	20	88	83
Drought	2	20	90	87
Drought	2	25	89	90
Drought	2	25	96	89
Drought	2	25	96	92
Drought	2	25	91	87
Drought	2	25	89	87
Drought	2	25	84	83
Drought	2	25	80	82
Drought	2	25	94	81
Drought	2	25	85	90
Drought	2	25	86	84
Drought	2	25	90	86
Drought	2	25	82	86
Drought	2	25	92	81
Drought	2	25	84	89
Drought	2	25	78	87
Drought	2	25	76	80
Drought	2	25	85	85
Drought	2	25	83	81
Drought	2	25	82	82
Drought	2	25	73	82
Drought	2	30	70	89
Drought	2	30	86	89
Drought	2	30	91	86
Drought	2	30	91	88
Drought	2	30	92	88
Drought	2	30	85	82
Drought	2	30	89	84
Drought	2	30	80	86
Drought	2	30	77	87
Drought	2	30	83	80
Drought	2	30	84	82
Drought	2	30	77	78
Drought	2	30	83	85
Drought	2	30	75	82
Drought	2	30	86	83
Drought	2	30	77	83
Drought	2	30	69	87
Drought	2	30	83	80
Drought	2	30	70	78
Drought	2	30	76	76

## Sheet: leaf photosynthetic traits
treatment	처리구	day	Pn max (mmolCO2 m-2 s-1)	E (mmol H2O m-2 s-1)	gs (mmol m-2 s-1)	WUE (mmol CO2 mmol H2O-1)
Control	1	1	10.3988	1.3027	0.2251	7.6461
Control	1	1	10.1639	1.3097	0.1805	7.6676
Control	1	1	9.2825	1.3091	0.202	7.2652
Control	1	1	9.9285	1.3191	0.2191	7.739
Control	1	1	9.9264	1.3133	0.2003	7.5966
Control	1	1	9.3523	1.3198	0.2373	7.0776
Control	1	1	9.7333	1.3209	0.2009	7.4664
Control	1	1	9.6895	1.3352	0.2191	7.2294
Control	1	1	9.6553	1.3311	0.2072	7.4296
Control	1	1	9.5642	1.319	0.2195	7.0131
Control	1	1	9.5844	1.3065	0.2048	6.8394
Control	1	1	8.8128	1.3175	0.2882	7.2248
Control	1	1	9.4293	1.315	0.2549	7.1059
Control	1	1	9.2994	1.2866	0.2399	6.9844
Control	1	1	9.1596	1.3114	0.2487	7.2475
Control	1	5	8.7968	1.2232	0.1643	6.8759
Control	1	5	9.2664	1.3269	0.1673	6.8841
Control	1	5	8.9963	1.3169	0.1529	6.5169
Control	1	5	8.9834	1.5238	0.1694	6.5611
Control	1	5	8.7236	1.3141	0.158	6.5446
Control	1	5	8.7108	1.3458	0.1637	6.9392
Control	1	5	9.2746	1.4551	0.1232	6.7357
Control	1	5	9.5156	1.3318	0.1616	6.2609
Control	1	5	9.6554	1.4502	0.155	6.6924
Control	1	5	9.2641	1.3816	0.142	6.6973
Control	1	5	9.3789	1.5643	0.1428	6.2838
Control	1	5	9.0961	1.3758	0.1489	6.5274
Control	1	5	9.4031	1.5449	0.1247	6.265
Control	1	5	9.5826	1.3587	0.1328	6.4737
Control	1	5	9.3448	1.5093	0.1412	6.278
Control	1	10	10.6673	1.4471	0.1223	7.0809
Control	1	10	10.9467	1.4803	0.1339	6.9833
Control	1	10	10.84	1.5338	0.1469	7.09
Control	1	10	10.3407	1.6544	0.1272	7.1378
Control	1	10	10.5529	1.4579	0.1362	6.927
Control	1	10	8.719	1.6874	0.1458	5.3765
Control	1	10	9.0223	1.6533	0.1176	5.3671
Control	1	10	9.1118	1.7587	0.1375	5.5176
Control	1	10	9.0671	1.5446	0.1334	5.5819
Control	1	10	8.8462	1.6209	0.1328	5.2394
Control	1	10	9.3929	1.2774	0.1362	6.9366
Control	1	10	9.0697	1.3685	0.1243	6.7999
Control	1	10	9.4019	1.3422	0.1562	7.3853
Control	1	10	9.4926	1.2613	0.1428	7.1172
Control	1	10	9.0636	1.3766	0.1515	6.789
Control	1	15	9.8325	1.2904	0.1508	7.1706
Control	1	15	9.1792	1.2797	0.1315	7.1881
Control	1	15	9.4301	1.3582	0.1333	7.2153
Control	1	15	9.1847	1.3384	0.1595	7.227
Control	1	15	9.5186	1.2703	0.1634	7.2585
Control	1	15	9.3794	1.3085	0.1579	7.2994
Control	1	15	9.7186	1.3861	0.1414	7.3631
Control	1	15	10.0533	1.3001	0.1547	7.2715
Control	1	15	9.6038	1.3991	0.1567	7.245
Control	1	15	10.152	1.3113	0.1603	7.291
Control	1	15	10.5906	1.3939	0.1903	7.1753
Control	1	15	10.1962	1.3567	0.148	7.1452
Control	1	15	10.3338	1.403	0.1636	7.2154
Control	1	15	9.463	1.4327	0.156	7.2745
Control	1	15	9.6875	1.3782	0.2106	7.2791
Control	1	20	9.1557	1.1045	0.1293	7.563
Control	1	20	9.5396	1.3275	0.1409	7.7361
Control	1	20	9.7113	1.4348	0.1323	5.7188
Control	1	20	9.738	1.4374	0.1394	6.7339
Control	1	20	10.2868	1.4008	0.1376	8.3631
Control	1	20	10.1665	0.9406	0.1344	8.6148
Control	1	20	10.2081	0.9981	0.132	9.0582
Control	1	20	10.0612	1.1801	0.138	10.5357
Control	1	20	10.0543	1.0674	0.1339	9.8605
Control	1	20	10.2038	1.1873	0.1306	9.0994
Control	1	20	10.0253	1.6754	0.1246	7.314
Control	1	20	10.5471	1.4319	0.1251	9.701
Control	1	20	10.7386	1.3343	0.1282	6.4576
Control	1	20	11.2459	1.8291	0.133	5.7113
Control	1	20	11.4091	1.0823	0.1285	7.513
Control	1	25	8.5098	1.4448	0.1533	7.1929
Control	1	25	8.4676	1.5849	0.1531	6.0868
Control	1	25	8.8343	1.1091	0.1531	6.4476
Control	1	25	8.5788	1.3054	0.1533	7.0901
Control	1	25	8.6599	1.1818	0.1531	5.6676
Control	1	25	8.8804	1.3311	0.1534	6.841
Control	1	25	8.9335	1.2696	0.1533	6.8691
Control	1	25	8.8813	1.1088	0.1538	8.3068
Control	1	25	9.0499	1.1291	0.1535	8.5798
Control	1	25	9.0619	0.9609	0.1536	8.0319
Control	1	25	8.9033	2.1438	0.1535	5.9411
Control	1	25	8.8767	1.3408	0.1537	6.3343
Control	1	25	9.2242	1.2093	0.1534	7.129
Control	1	25	9.0355	1.4635	0.1534	5.8944
Control	1	25	9.7528	1.4161	0.1534	4.9326
Control	1	30	7.9006	1.138	0.1375	6.8812
Control	1	30	9.2412	1.1501	0.1362	6.437
Control	1	30	8.1681	1.2482	0.1373	7.4568
Control	1	30	7.965	1.1291	0.1347	7.4972
Control	1	30	9.005	1.1341	0.1363	8.1777
Control	1	30	7.4353	1.0343	0.1352	9.9803
Control	1	30	9.0739	1.065	0.1383	8.4236
Control	1	30	10.1568	1.0682	0.137	7.9045
Control	1	30	9.1605	1.113	0.137	8.3939
Control	1	30	9.571	1.0931	0.1351	7.5382
Control	1	30	10.4142	1.0711	0.133	8.6185
Control	1	30	8.0351	1.0758	0.1254	8.2887
Control	1	30	9.0077	1.0619	0.1342	8.8426
Control	1	30	11.2159	1.0907	0.1329	10.214
Control	1	30	10.0638	1.1495	0.1316	8.7571
Drought	2	1	10.5436	1.6402	0.1837	7.0699
Drought	2	1	11.2238	1.4933	0.1823	8.1651
Drought	2	1	11.5423	1.3271	0.1882	7.8187
Drought	2	1	10.8626	1.4331	0.1812	6.5659
Drought	2	1	11.2253	1.6798	0.1847	6.953
Drought	2	1	11.2361	1.2717	0.1835	6.9921
Drought	2	1	10.0994	1.3367	0.1807	7.3325
Drought	2	1	10.8187	1.4335	0.1811	7.2707
Drought	2	1	11.0463	1.3817	0.1833	7.7035
Drought	2	1	10.1956	1.2814	0.183	7.2738
Drought	2	1	10.2854	1.5875	0.1799	6.9824
Drought	2	1	10.4168	1.4632	0.1827	7.7931
Drought	2	1	10.6528	1.3722	0.175	7.3945
Drought	2	1	10.3383	1.4912	0.1786	6.5919
Drought	2	1	10.1482	1.4389	0.1779	6.4906
Drought	2	5	9.2566	1.3171	0.1594	7.0808
Drought	2	5	9.1799	1.275	0.1615	6.8231
Drought	2	5	8.9689	1.3879	0.1607	6.7633
Drought	2	5	9.5234	1.2942	0.1598	7.6001
Drought	2	5	8.8638	1.2798	0.1561	6.6662
Drought	2	5	8.38	1.1159	0.1651	7.2636
Drought	2	5	8.4442	1.2651	0.1586	7.7826
Drought	2	5	8.0209	1.1978	0.1573	7.7673
Drought	2	5	8.8401	1.143	0.1608	7.0176
Drought	2	5	8.5948	1.0778	0.1563	6.6188
Drought	2	5	9.214	1.1754	0.163	7.8278
Drought	2	5	8.6558	1.1241	0.1643	6.8598
Drought	2	5	9.6758	1.1506	0.1641	8.125
Drought	2	5	8.551	1.2032	0.1651	8.2124
Drought	2	5	9.3009	1.1463	0.164	8.1124
Drought	2	10	9.4788	1.0347	0.1296	9.7646
Drought	2	10	9.8293	1.0283	0.1163	8.635
Drought	2	10	9.7498	1.0485	0.1351	9.6165
Drought	2	10	9.6267	1.0145	0.1195	9.7223
Drought	2	10	9.7469	1.0411	0.1281	9.1261
Drought	2	10	8.5469	1.0506	0.1157	8.8437
Drought	2	10	9.5826	1.0759	0.1161	7.7543
Drought	2	10	8.1907	1.1092	0.1266	7.7981
Drought	2	10	8.1665	1.0472	0.1151	8.2904
Drought	2	10	8.5638	1.0616	0.125	7.5878
Drought	2	10	9.208	1.0542	0.1097	8.5537
Drought	2	10	9.414	1.0734	0.1171	8.5231
Drought	2	10	8.7043	1.0988	0.1199	8.7573
Drought	2	10	8.7294	1.0621	0.1148	7.8096
Drought	2	10	8.7109	1.0465	0.111	8.3133
Drought	2	15	8.9097	0.9416	0.0352	8.7629
Drought	2	15	7.1297	0.9496	0.0352	7.7209
Drought	2	15	7.6878	1.0084	0.0352	7.4499
Drought	2	15	7.9311	1.0466	0.0355	7.8526
Drought	2	15	7.2343	0.9793	0.0352	7.6948
Drought	2	15	7.3524	0.9522	0.0353	7.5255
Drought	2	15	6.7823	0.9935	0.0355	8.2132
Drought	2	15	7.3699	0.9481	0.0353	6.3315
Drought	2	15	7.9735	0.9938	0.0353	8.039
Drought	2	15	7.4809	0.9699	0.0355	7.9329
Drought	2	15	6.2567	0.9356	0.0355	7.3728
Drought	2	15	6.4937	0.9528	0.0357	6.4157
Drought	2	15	7.0864	0.9867	0.0356	7.0641
Drought	2	15	5.7086	0.8844	0.0357	7.3072
Drought	2	15	6.8791	0.949	0.0354	6.2727
Drought	2	20	5.029	0.7029	0.0209	7.7566
Drought	2	20	4.7627	0.5867	0.0208	8.0507
Drought	2	20	4.4991	0.555	0.0202	8.7075
Drought	2	20	4.2391	0.4777	0.0209	7.5012
Drought	2	20	4.7816	0.5463	0.0202	8.6199
Drought	2	20	4.0684	0.4772	0.0196	7.2315
Drought	2	20	3.8277	0.5621	0.0221	8.0209
Drought	2	20	3.9624	0.5183	0.0217	8.4986
Drought	2	20	3.7319	0.3759	0.0219	7.454
Drought	2	20	4.2146	0.5366	0.0221	8.8874
Drought	2	20	4.3018	0.4314	0.0213	8.4498
Drought	2	20	4.3794	0.4957	0.0218	9.1756
Drought	2	20	4.329	0.5415	0.0217	8.1629
Drought	2	20	4.7197	0.4932	0.0224	8.932
Drought	2	20	3.8081	0.4872	0.0219	9.2523
Drought	2	25	3.5508	0.2837	0.0133	18.546
Drought	2	25	3.5358	0.2661	0.0139	16.3873
Drought	2	25	3.5098	0.1927	0.0142	11.0605
Drought	2	25	3.498	0.1637	0.0146	19.2933
Drought	2	25	3.4917	0.1928	0.0125	14.7369
Drought	2	25	3.5522	0.2383	0.0142	23.6433
Drought	2	25	3.5819	0.239	0.0138	13.5065
Drought	2	25	3.5435	0.1432	0.0148	11.4058
Drought	2	25	3.5174	0.2458	0.0148	12.128
Drought	2	25	3.564	0.2471	0.0154	19.0654
Drought	2	25	3.5578	0.2154	0.0163	10.449
Drought	2	25	3.5332	0.4382	0.0153	9.2895
Drought	2	25	3.5437	0.3397	0.0171	11.4513
Drought	2	25	3.5494	0.3522	0.013	11.765
Drought	2	25	3.5744	0.2874	0.0148	11.4206
Drought	2	30	0.2437	0.154	0.0158	10.2471
Drought	2	30	1.1318	0.1331	0.0156	19.9716
Drought	2	30	5.1234	0.1121	0.0167	20.4899
Drought	2	30	1.9303	0.1081	0.0157	20.9274
Drought	2	30	2.6184	0.1233	0.0161	16.0026
Drought	2	30	3.9801	0.1963	0.0179	11.9592
Drought	2	30	1.7332	0.3334	0.0172	7.4949
Drought	2	30	5.2859	0.2969	0.0174	19.3505
Drought	2	30	2.2923	0.2109	0.0173	13.3147
Drought	2	30	1.248	0.097	0.0169	11.9564
Drought	2	30	1.4927	0.1842	0.0178	5.2557
Drought	2	30	1.2814	0.0963	0.0195	11.8569
Drought	2	30	1.1853	0.1062	0.0179	7.794
Drought	2	30	1.2157	0.0645	0.0179	11.9326
Drought	2	30	1.4748	0.1908	0.016	14.9692

## Sheet: leaf chlorophyll fluorescence
treatment	처리구	day	fvfm	ФPSⅡ	Rfd	NPQ	Piabs
Control	1	1	0.8503	0.7471	5.9453	3.1016	10.4856
Control	1	1	0.8255	0.791	5.6399	3.0742	8.863
Control	1	1	0.8297	0.7698	5.6031	3.0661	7.8052
Control	1	1	0.8569	0.7555	5.5261	3.101	12.156
Control	1	1	0.8455	0.7266	4.9406	3.0322	10.3352
Control	1	1	0.7891	0.7508	5.1727	3.1013	7.7985
Control	1	1	0.8201	0.7591	5.2266	3.1414	6.8132
Control	1	1	0.8742	0.7627	5.0329	3.1154	7.2396
Control	1	1	0.8068	0.7622	4.6854	3.1697	9.6001
Control	1	1	0.7773	0.7602	4.7475	3.1322	6.8737
Control	1	1	0.7723	0.7881	5.1151	3.0478	9.1809
Control	1	1	0.8072	0.792	5.2599	3.0772	7.9534
Control	1	1	0.8159	0.8096	5.1106	3.0942	10.8413
Control	1	1	0.7642	0.8265	5.2425	3.0667	9.4525
Control	1	1	0.7844	0.8088	4.2119	3.0891	8.7569
Control	1	5	0.7994	0.6358	4.0024	2.5994	6.5278
Control	1	5	0.7886	0.6485	3.9853	3.2722	7.115
Control	1	5	0.7989	0.644	4.1427	3.2611	7.4614
Control	1	5	0.784	0.6092	4.1182	3.1245	6.6008
Control	1	5	0.7991	0.6115	3.9244	2.8827	7.83
Control	1	5	0.7775	0.6409	4.3712	3.2481	7.1407
Control	1	5	0.8068	0.6251	3.9621	3.4326	9.7334
Control	1	5	0.771	0.6761	4.248	3.6551	7.8837
Control	1	5	0.805	0.616	4.5232	3.5288	9.8895
Control	1	5	0.8097	0.5909	4.304	4.0804	8.7778
Control	1	5	0.754	0.5437	4.1535	3.6045	8.7854
Control	1	5	0.7133	0.5664	4.1333	2.849	7.5941
Control	1	5	0.7796	0.6101	4.2057	2.7892	8.4709
Control	1	5	0.7007	0.5582	4.2568	3.004	7.9405
Control	1	5	0.7424	0.5736	4.1062	3.1283	7.0341
Control	1	10	0.7979	0.7697	4.7909	5.27	7.0895
Control	1	10	0.8074	0.7687	5.3097	3.042	6.4713
Control	1	10	0.8145	0.762	5.6305	2.9443	7.5038
Control	1	10	0.8208	0.7602	4.1882	2.687	7.6359
Control	1	10	0.8269	0.7693	4.9506	5.6217	6.8345
Control	1	10	0.7818	0.8119	4.8051	2.8647	7.9885
Control	1	10	0.7839	0.7883	4.6263	1.548	9.2477
Control	1	10	0.7926	0.7955	4.4302	1.9734	8.1862
Control	1	10	0.7941	0.7964	4.3856	2.5733	9.9301
Control	1	10	0.7917	0.7878	5.0027	2.5556	8.0726
Control	1	10	0.8181	0.7796	5.5591	3.7201	7.5106
Control	1	10	0.7746	0.7831	5.252	2.325	9.0753
Control	1	10	0.7817	0.8162	4.7637	3.8143	7.6378
Control	1	10	0.808	0.7956	5.4505	3.8646	7.7339
Control	1	10	0.7877	0.7755	6.2798	2.061	7.8674
Control	1	15	0.8357	0.6216	5.2086	3.2497	8.181
Control	1	15	0.8406	0.6689	5.3452	4.9541	7.9275
Control	1	15	0.8649	0.6582	5.3477	3.1258	8.2077
Control	1	15	0.851	0.6772	5.3909	1.7656	8.4012
Control	1	15	0.8159	0.6491	5.2277	3.3447	8.5075
Control	1	15	0.7913	0.6052	5.2947	3.8515	6.6523
Control	1	15	0.8223	0.6204	5.1263	3.6767	8.0143
Control	1	15	0.7845	0.6035	5.1053	3.8533	7.5259
Control	1	15	0.8237	0.5907	5.2382	3.5658	7.2359
Control	1	15	0.7483	0.6202	5.2105	2.5327	7.6116
Control	1	15	0.8344	0.6414	5.0446	2.6309	6.5073
Control	1	15	0.8076	0.6424	5.1724	2.2016	7.4325
Control	1	15	0.8215	0.66	5.1927	1.9988	7.703
Control	1	15	0.8465	0.6307	4.9968	2.2386	7.5593
Control	1	15	0.7574	0.6256	5.1684	2.3751	7.6829
Control	1	20	0.8162	0.8115	5.2284	3.7786	7.8886
Control	1	20	0.796	0.7527	5.1144	3.6875	7.3879
Control	1	20	0.833	0.7293	5.428	3.5746	6.9104
Control	1	20	0.8276	0.7778	5.6034	3.7	6.5256
Control	1	20	0.7948	0.6987	5.2359	3.4944	6.8374
Control	1	20	0.805	0.6449	5.9412	3.8498	7.9493
Control	1	20	0.7979	0.6997	6.0141	3.6109	8.0814
Control	1	20	0.7783	0.7179	4.6196	3.786	6.4823
Control	1	20	0.8045	0.6467	6.6757	3.9941	5.7316
Control	1	20	0.7843	0.6908	5.9194	3.8392	6.4454
Control	1	20	0.7905	0.6913	4.2548	3.5434	7.3859
Control	1	20	0.8022	0.7178	4.4841	3.6143	8.9301
Control	1	20	0.8044	0.7325	4.2809	3.5784	7.9559
Control	1	20	0.7656	0.724	4.2381	3.7306	8.899
Control	1	20	0.7813	0.7594	5.2971	3.7682	7.7991
Control	1	25	0.8103	0.8452	4.9164	3.7531	7.9526
Control	1	25	0.7653	0.7678	4.7275	3.6573	7.714
Control	1	25	0.8029	0.7818	5.4754	3.8916	7.1437
Control	1	25	0.7612	0.727	4.8966	3.9367	8.1036
Control	1	25	0.8042	0.8033	5.1891	3.9414	7.2911
Control	1	25	0.756	0.716	5.2425	3.3268	7.3874
Control	1	25	0.7395	0.5821	5.6989	3.3193	7.544
Control	1	25	0.6904	0.7098	5.4866	3.5644	7.2678
Control	1	25	0.7476	0.5946	5.1037	3.8223	7.2454
Control	1	25	0.7564	0.5875	5.5333	3.4472	7.6605
Control	1	25	0.8189	0.7001	5.044	3.7674	7.7439
Control	1	25	0.8213	0.6596	4.9155	3.7797	8.8778
Control	1	25	0.7471	0.742	5.0665	3.8953	8.3766
Control	1	25	0.7964	0.741	5.2965	3.4133	7.9628
Control	1	25	0.7863	0.8523	4.6976	3.3793	8.1039
Control	1	30	0.7891	0.6515	6.9788	3.2425	7.3117
Control	1	30	0.8198	0.676	5.1491	3.371	7.2786
Control	1	30	0.7882	0.5996	4.7566	3.2489	7.2844
Control	1	30	0.785	0.6764	4.6276	3.3782	7.2404
Control	1	30	0.7878	0.5866	5.493	3.3644	7.3398
Control	1	30	0.8187	0.7689	5.2953	3.6224	7.2051
Control	1	30	0.8286	0.7817	5.1893	3.3434	7.2754
Control	1	30	0.7712	0.7804	5.158	3.3191	7.2742
Control	1	30	0.7965	0.6175	5.1646	3.4721	7.3964
Control	1	30	0.7549	0.7465	5.0828	3.3381	7.4438
Control	1	30	0.7623	0.8684	5.3247	3.1362	7.4002
Control	1	30	0.7312	0.7897	5.3135	3.2008	7.4541
Control	1	30	0.706	0.7725	5.2846	3.1399	7.4326
Control	1	30	0.7457	0.5853	5.3184	3.2932	7.3369
Control	1	30	0.7447	0.7691	5.3638	3.2499	7.5362
Drought	2	1	0.7924	0.8201	5.2504	3.6777	8.009
Drought	2	1	0.7715	0.8219	5.2922	3.7645	8.2333
Drought	2	1	0.8037	0.8232	5.3294	3.683	8.2566
Drought	2	1	0.8076	0.8116	5.4042	4.5094	8.2623
Drought	2	1	0.7947	0.8182	5.2438	3.5454	8.0838
Drought	2	1	0.7933	0.7963	5.1137	3.8801	8.2415
Drought	2	1	0.7854	0.7901	5.2833	4.4444	8.2599
Drought	2	1	0.7944	0.7929	5.1308	3.8167	8.1765
Drought	2	1	0.7941	0.8136	5.2344	3.6021	8.0097
Drought	2	1	0.7769	0.802	5.1528	4.0267	8.1574
Drought	2	1	0.8283	0.8062	5.0948	3.3082	7.8887
Drought	2	1	0.7983	0.8095	5.1915	3.3766	7.978
Drought	2	1	0.8044	0.7741	5.0898	3.096	7.9478
Drought	2	1	0.8175	0.7989	5.0284	3.5107	8.2048
Drought	2	1	0.8191	0.8063	5.2406	3.5235	8.0357
Drought	2	5	0.7256	0.7556	4.7511	2.8227	7.6991
Drought	2	5	0.6792	0.7697	5.0155	2.6442	7.3393
Drought	2	5	0.6405	0.7729	5.1483	3.382	6.5477
Drought	2	5	0.6755	0.7521	5.2417	2.3754	7.9097
Drought	2	5	0.6612	0.7648	5.4434	2.5858	6.9592
Drought	2	5	0.6997	0.7737	4.7816	2.0441	6.2212
Drought	2	5	0.6995	0.7739	4.8561	2.3244	6.0145
Drought	2	5	0.5834	0.8232	4.5886	2.2961	6.3363
Drought	2	5	0.7415	0.7619	4.8567	1.9899	7.0585
Drought	2	5	0.6579	0.7573	4.837	1.7905	5.9645
Drought	2	5	0.6503	0.7994	4.7098	2.3945	6.7951
Drought	2	5	0.8629	0.7766	4.5327	2.5084	6.4424
Drought	2	5	0.7543	0.8379	5.0668	2.6638	6.1475
Drought	2	5	0.8053	0.802	4.417	2.3536	6.1084
Drought	2	5	0.8712	0.7841	5.1388	2.4847	6.6666
Drought	2	10	0.5786	0.5104	3.1607	2.4641	5.4745
Drought	2	10	0.5034	0.4822	3.487	2.7008	5.8962
Drought	2	10	0.5708	0.4897	3.2432	1.9292	7.5692
Drought	2	10	0.521	0.4997	3.3433	2.6082	5.7647
Drought	2	10	0.5562	0.4981	3.3707	2.3028	7.2655
Drought	2	10	0.6564	0.4421	3.3791	1.5958	6.3809
Drought	2	10	0.8217	0.4614	3.4132	1.774	7.5758
Drought	2	10	0.5099	0.4079	3.4055	1.8409	6.7543
Drought	2	10	0.5971	0.4657	3.565	2.0077	6.311
Drought	2	10	0.7969	0.4579	3.3322	1.9415	7.218
Drought	2	10	0.7065	0.5293	3.3502	1.8879	6.1488
Drought	2	10	0.7283	0.4592	3.1965	2.0408	4.5088
Drought	2	10	0.5842	0.4507	3.1576	2.6652	5.4861
Drought	2	10	0.7428	0.4615	3.2692	1.8414	5.6983
Drought	2	10	0.6383	0.4592	3.0464	1.9847	5.7731
Drought	2	15	0.6247	0.346	2.2192	1.0696	8.6674
Drought	2	15	0.5709	0.3624	2.6485	1.0191	5.5407
Drought	2	15	0.5861	0.3292	2.6637	1.0901	7.0676
Drought	2	15	0.5728	0.3414	2.3299	0.9733	3.5582
Drought	2	15	0.6054	0.3461	2.4737	0.9379	8.0061
Drought	2	15	0.5634	0.4077	2.3464	1.0215	5.5964
Drought	2	15	0.5336	0.3711	2.4982	1.0548	5.606
Drought	2	15	0.4929	0.4165	2.3169	1.0566	5.5231
Drought	2	15	0.5056	0.3739	2.4292	1.1246	5.8093
Drought	2	15	0.5445	0.3807	2.4144	1.1025	4.7952
Drought	2	15	0.6108	0.3159	2.3389	0.9838	3.2505
Drought	2	15	0.5894	0.3797	2.0422	0.9844	3.9121
Drought	2	15	0.6178	0.3231	2.232	1.0128	5.0712
Drought	2	15	0.5716	0.3104	2.0795	0.9244	5.0334
Drought	2	15	0.5454	0.3659	2.1974	0.9697	4.8327
Drought	2	20	0.6764	0.2369	1.4789	0.9358	4.235
Drought	2	20	0.612	0.2048	1.3516	0.9624	4.1098
Drought	2	20	0.6202	0.1871	1.3406	0.9384	4.6832
Drought	2	20	0.7227	0.2033	1.4165	0.9358	3.7137
Drought	2	20	0.7507	0.1978	1.2625	0.9326	4.1733
Drought	2	20	0.5725	0.2122	1.4082	0.9865	3.8722
Drought	2	20	0.6359	0.2199	1.5074	0.9534	5.2224
Drought	2	20	0.5601	0.1914	1.3299	1.0137	5.0299
Drought	2	20	0.6004	0.2255	1.3619	0.9577	3.9378
Drought	2	20	0.5311	0.181	1.4425	0.9787	4.1327
Drought	2	20	0.5703	0.2766	1.7114	0.9707	3.128
Drought	2	20	0.5354	0.288	1.5274	1.016	4.0255
Drought	2	20	0.6011	0.2461	1.525	0.9376	3.5445
Drought	2	20	0.6178	0.3044	1.5366	0.979	3.5584
Drought	2	20	0.6354	0.1948	1.4346	0.9717	3.5985
Drought	2	25	0.555	0.2274	1.0085	0.8293	2.9021
Drought	2	25	0.59	0.2095	0.9558	0.872	2.3996
Drought	2	25	0.5819	0.1769	1.1038	0.8481	3.7683
Drought	2	25	0.6005	0.1925	1.0285	0.9533	3.3541
Drought	2	25	0.6326	0.1836	1.0784	0.8723	3.086
Drought	2	25	0.4745	0.1951	1.4655	0.8236	1.6196
Drought	2	25	0.5284	0.1722	1.6464	0.791	1.658
Drought	2	25	0.4941	0.181	1.8941	0.8331	1.6392
Drought	2	25	0.563	0.1864	1.1966	0.7653	2.0369
Drought	2	25	0.5801	0.1903	1.5424	0.7671	2.1313
Drought	2	25	0.5612	0.2175	1.5138	0.8309	3.4725
Drought	2	25	0.5695	0.2508	1.3591	0.8356	0.8948
Drought	2	25	0.6211	0.2503	1.3248	0.9303	4.7038
Drought	2	25	0.624	0.1936	1.0108	0.8989	3.3102
Drought	2	25	0.5592	0.2128	1.7715	0.8793	2.1236
Drought	2	30	0.6895	0.1734	0.9227	0.7287	1.1653
Drought	2	30	0.6632	0.1801	0.9119	0.7284	1.1103
Drought	2	30	0.6867	0.1853	0.899	0.6516	1.3117
Drought	2	30	0.7867	0.1791	0.9037	0.6037	1.4948
Drought	2	30	0.5559	0.1871	0.9177	0.6476	0.988
Drought	2	30	0.5348	0.2155	0.8568	0.6268	1.7885
Drought	2	30	0.4726	0.1857	0.8564	0.5799	1.312
Drought	2	30	0.5419	0.1969	0.8965	0.5969	1.6381
Drought	2	30	0.4019	0.1983	0.8778	0.5808	1.0928
Drought	2	30	0.4487	0.2086	0.8825	0.5707	1.5137
Drought	2	30	0.6528	0.227	0.8783	0.6173	1.6721
Drought	2	30	0.5828	0.2092	0.8888	0.5658	1.9236
Drought	2	30	0.6462	0.1957	0.8552	0.6132	1.896
Drought	2	30	0.5883	0.1947	0.8787	0.6266	1.6059
Drought	2	30	0.4899	0.1784	0.8739	0.6222	1.3074

## Sheet: Correlation analysis
Soil water content	Shoot	Root	Pnmax	E	gs	WUE	fvfm	ФPSⅡ	Rfd	NPQ	Piabs	Chl a	Chl b	Total chl	Chl a/b	Proline
18.271	100	95	11.0795	1.5147	0.184	7.3145	0.794	0.819	5.304	3.836	8.169	4.5773	1.9939	6.5695	2.2956	1.53
18.105	90	89	10.6792	1.341	0.1823	7.9635	0.7888	0.799	5.183	3.954	8.169	4.2105	1.91	6.1189	2.2044	1.52
17.867	96	92	10.3683	1.4706	0.1788	7.0505	0.8135	0.799	5.129	3.363	8.011	4.8806	2.1012	6.98	2.3227	1.5
22.705	99	85	9.1585	1.3108	0.1595	6.9867	0.6764	0.763	5.12	2.762	7.291	2.7941	1.5556	4.3485	1.7961	1.19
22.082	90	88	8.456	1.1599	0.1596	7.29	0.6764	0.778	4.784	2.089	6.319	3.2945	1.7437	5.0368	1.8894	1.08
22.513	96	91	9.0795	1.1599	0.1641	7.8275	0.7888	0.8	4.773	2.481	6.432	3.5042	1.8197	5.3225	1.9257	1.11
18.675	99	92	9.6863	1.0334	0.1257	9.3729	0.546	0.496	3.321	2.401	6.394	1.512	1.1955	2.7067	1.2647	1.45
18.033	89	88	8.6101	1.0689	0.1197	8.0549	0.6764	0.447	3.419	1.832	6.848	1.5901	1.2544	2.8437	1.2677	1.52
17.463	96	90	8.9533	1.067	0.1145	8.3914	0.68	0.472	3.204	2.084	5.523	2.0051	1.3425	3.3466	1.4936	1.57
12.1	91	85	7.7785	0.9851	0.0353	7.8962	0.592	0.345	2.467	1.018	6.568	2.2895	1.6101	3.8985	1.422	1.43
12.837	86	88	7.3918	0.9715	0.0354	7.6084	0.528	0.39	2.401	1.072	5.466	2.2595	1.5554	3.8138	1.4527	1.32
13.574	91	89	6.4849	0.9417	0.0356	6.8865	0.587	0.339	2.178	0.975	4.42	2.2502	1.4274	3.6766	1.5765	1.27
1.091	89	84	4.6623	0.5737	0.0206	8.1272	0.6764	0.206	1.37	0.941	4.183	1.3707	0.7437	2.1138	1.843	1.52
1.069	86	87	3.961	0.494	0.0215	8.0185	0.58	0.206	1.41	0.978	4.439	2.2595	0.8358	2.1343	2.7034	1.63
1.058	90	87	4.3076	0.4898	0.0218	8.7945	0.592	0.262	1.547	0.975	3.571	2.2502	1.0981	2.2199	2.0493	1.47
1.898	86	84	3.5172	0.2198	0.0137	16.0048	0.592	0.198	1.035	0.875	3.102	1.0327	0.5177	1.55	1.9948	2.08
1.895	85	86	3.5518	0.2227	0.0146	15.9498	0.528	0.185	1.549	0.796	1.817	1.1809	0.7041	1.8845	1.6773	2.34
1.881	80	82	3.5517	0.3266	0.0153	10.8751	0.587	0.225	1.396	0.875	2.901	1.1221	0.7915	1.913	1.4176	2.58
0.183	86	84	2.2095	0.1261	0.016	17.5277	0.6764	0.181	0.911	0.672	1.214	0.6679	0.5207	1.1882	1.2826	3.69
0.1752	83	82	2.9079	0.2269	0.0173	12.8151	0.48	0.201	0.874	0.591	1.469	1.0139	0.678	1.6914	1.4954	4.02
0.1695	81	81	1.33	0.1284	0.0178	10.3617	0.592	0.201	0.875	0.609	1.681	0.903	0.5874	1.49	1.5373	3.98

## Sheet: leaf chlorophyll
treatment	처리구	day	Chlorophyll a (mg g-1 DW)	Chlorophyll b (mg g-1 DW)	Total chlorophyll (mg g-1 DW)	Chlorophyll a/b ratio
Control	1	1	3.9196	1.9683	6.1525	1.6775
Control	1	1	3.8713	2.3199	6.2797	1.7572
Control	1	1	3.7654	1.9677	6.0877	1.8239
Control	1	1	3.7899	2.311	5.8797	1.7335
Control	1	1	3.911	2.3022	5.7182	1.8668
Control	1	1	3.7511	1.6894	6.108	1.9251
Control	1	1	3.8855	1.9092	5.53	1.7986
Control	1	1	3.9021	1.7982	5.4556	2.2992
Control	1	1	3.8415	2.3401	5.9683	2.1234
Control	1	1	3.7978	1.737	5.5828	1.9753
Control	1	1	3.7025	1.8485	5.7941	2.1455
Control	1	1	3.7363	1.9986	5.1727	2.1107
Control	1	1	3.7197	1.7567	5.3538	1.8406
Control	1	1	3.7545	1.959	5.8626	1.9946
Control	1	1	3.7474	1.6637	5.6965	2.0211
Control	1	5	3.1113	1.6466	4.5274	1.8602
Control	1	5	2.2764	1.5995	3.7032	1.6525
Control	1	5	2.229	1.4529	4.313	1.5318
Control	1	5	2.7892	1.5821	4.5126	1.7947
Control	1	5	2.6527	1.5045	3.7818	1.5473
Control	1	5	3.1214	1.7064	4.9053	1.9911
Control	1	5	2.7353	1.5896	4.3575	1.8553
Control	1	5	3.0654	1.617	4.7918	1.5794
Control	1	5	2.9914	1.605	4.3461	2.1075
Control	1	5	2.9921	1.5725	4.5895	1.678
Control	1	5	3.1694	1.5213	4.6868	2.2438
Control	1	5	3.0562	1.4886	4.0646	2.2302
Control	1	5	3.4503	1.5275	4.8328	1.8583
Control	1	5	3.2795	1.5712	5.3211	2.0173
Control	1	5	3.2834	1.4906	4.9266	2.3354
Control	1	10	2.1901	1.143	3.8076	1.5743
Control	1	10	2.4345	1.4201	1.879	1.7724
Control	1	10	2.2387	1.4419	3.76	1.5998
Control	1	10	1.3183	1.3992	4.5451	1.8358
Control	1	10	2.8828	1.2539	3.7258	1.5265
Control	1	10	3.2493	1.6653	4.6014	2.0004
Control	1	10	3.0627	1.6763	4.7447	2.0753
Control	1	10	3.9507	1.3601	5.3682	1.8816
Control	1	10	3.0869	1.7263	4.2339	1.66
Control	1	10	2.2912	1.6109	4.7255	2.1113
Control	1	10	3.802	1.6944	3.7784	2.3253
Control	1	10	2.0034	1.5336	5.7413	1.8904
Control	1	10	3.7508	1.7579	5.2577	2.124
Control	1	10	3.0108	1.5317	5.6313	2.0969
Control	1	10	3.8091	1.4695	3.9476	1.8151
Control	1	15	3.6671	1.4009	4.7993	2.2231
Control	1	15	3.6141	1.4634	5.3987	2.1983
Control	1	15	3.5918	2.0227	5.1772	2.0118
Control	1	15	3.6485	1.5393	5.4049	2.6343
Control	1	15	3.6283	1.4546	5.2446	2.4481
Control	1	15	2.6629	1.4954	4.6654	2.7161
Control	1	15	2.6806	1.3212	5.0045	3.1502
Control	1	15	2.5131	1.0714	4.9045	2.4479
Control	1	15	2.6402	1.1305	4.9123	2.8343
Control	1	15	2.6377	1.4438	5.1044	2.8821
Control	1	15	3.5665	1.4493	4.7527	2.5829
Control	1	15	3.5482	1.2106	5.0029	2.85
Control	1	15	3.4405	1.1837	4.9349	3.0211
Control	1	15	3.5514	1.1918	4.4739	2.5944
Control	1	15	3.4834	1.4087	4.8636	2.5998
Control	1	20	5.2162	2.2703	6.8838	3.4682
Control	1	20	5.1596	1.9052	7.0537	2.2054
Control	1	20	4.9932	1.7426	6.8	2.8852
Control	1	20	4.8298	1.9324	6.9924	3.2438
Control	1	20	5.1101	1.6644	7.0855	1.4968
Control	1	20	5.2653	2.0402	6.9693	2.967
Control	1	20	5.1577	1.2047	6.9291	2.5607
Control	1	20	5.0757	2.0201	6.808	3.0011
Control	1	20	5.121	1.4209	6.7786	2.5694
Control	1	20	5.3048	1.7262	6.8433	4.3112
Control	1	20	5.3002	1.3884	6.6667	3.8259
Control	1	20	5.4567	1.2168	6.6097	4.8121
Control	1	20	5.3375	1.3134	6.6677	3.0072
Control	1	20	5.4268	1.4783	6.7687	3.5765
Control	1	20	5.1227	1.5445	6.865	3.9697
Control	1	25	3.9431	2.0029	6.0711	1.9083
Control	1	25	3.9818	2.3682	5.7016	2.0168
Control	1	25	4.0002	1.9909	6.0765	1.8864
Control	1	25	3.9123	2.1217	6.0062	2.0142
Control	1	25	4.0314	1.831	6.3201	1.8059
Control	1	25	3.9864	1.8863	5.9926	2.0955
Control	1	25	3.8976	1.9953	5.8032	2.0731
Control	1	25	3.9531	1.8527	5.9793	2.0376
Control	1	25	4.0028	1.8651	5.7782	2.0866
Control	1	25	3.9324	1.9842	5.7953	2.0234
Control	1	25	3.7741	1.9776	5.8371	2.0953
Control	1	25	3.7546	1.7674	5.5637	1.9589
Control	1	25	3.8512	1.7353	5.9674	2.214
Control	1	25	3.9583	1.9574	5.5659	2.164
Control	1	25	3.9937	1.7604	5.5882	2.0763
Control	1	30	3.5971	1.5536	5.1136	1.9834
Control	1	30	3.5893	1.7586	5.6183	1.9009
Control	1	30	3.6179	1.6177	5.5262	2.3765
Control	1	30	3.6063	1.9616	5.356	2.3497
Control	1	30	3.6051	2.1347	5.4206	1.3694
Control	1	30	3.6134	1.4793	5.1224	2.0238
Control	1	30	3.6635	1.2226	5.0564	2.5085
Control	1	30	3.6769	1.6301	5.3224	2.8271
Control	1	30	3.6336	1.8429	5.3145	2.2081
Control	1	30	3.653	1.4534	5.0466	2.388
Control	1	30	3.6301	1.2836	4.7696	2.5239
Control	1	30	3.6227	1.7109	4.9928	2.6714
Control	1	30	3.6381	0.9042	4.9364	3.091
Control	1	30	3.616	1.212	4.6516	2.6113
Control	1	30	3.6139	1.4664	5.3415	2.8782
Drought	2	1	4.0751	1.9186	6.7858	2.3162
Drought	2	1	4.7053	1.9501	6.349	2.2737
Drought	2	1	5.0706	1.923	6.8261	2.3265
Drought	2	1	4.192	2.0779	6.6815	2.2295
Drought	2	1	4.8434	2.1	6.2049	2.3319
Drought	2	1	4.396	1.8605	6.4265	2.1758
Drought	2	1	3.6171	1.9822	5.7513	2.2843
Drought	2	1	4.6366	1.8979	5.9571	2.1235
Drought	2	1	4.0828	1.9859	6.0466	2.1592
Drought	2	1	4.3202	1.8233	6.4131	2.2793
Drought	2	1	4.8695	2.0961	7.1712	2.281
Drought	2	1	4.9035	2.2135	7.0656	2.4376
Drought	2	1	4.8296	2.0015	6.714	2.3493
Drought	2	1	5.1533	2.0353	6.9049	2.223
Drought	2	1	4.6473	2.1594	7.0441	2.3224
Drought	2	5	3.0321	1.5344	4.5991	1.8045
Drought	2	5	1.8857	1.4902	4.0472	1.724
Drought	2	5	3.2858	1.5352	4.8375	1.7312
Drought	2	5	2.6856	1.5294	4.4133	1.8757
Drought	2	5	3.0815	1.6886	3.8453	1.8453
Drought	2	5	3.5708	1.4667	6.0333	1.8571
Drought	2	5	3.7015	1.7903	5.0022	1.83
Drought	2	5	3.046	1.7723	4.8812	1.9832
Drought	2	5	3.0325	1.8309	4.8378	2.0273
Drought	2	5	3.1217	1.8583	4.4295	1.7492
Drought	2	5	2.9714	1.7076	5.7025	1.9599
Drought	2	5	3.7223	1.8102	4.6619	1.992
Drought	2	5	3.677	1.8566	5.5877	1.9436
Drought	2	5	3.178	1.9543	5.4132	1.7681
Drought	2	5	3.9722	1.77	5.2471	1.965
Drought	2	10	1.6592	1.1842	3.0165	1.2267
Drought	2	10	1.756	1.1744	3.2107	1.2806
Drought	2	10	1.7793	1.2441	2.1539	1.1646
Drought	2	10	1.3904	1.1232	2.308	1.3531
Drought	2	10	0.9749	1.2517	2.8445	1.2986
Drought	2	10	1.334	1.343	2.9664	1.2873
Drought	2	10	1.6872	1.2553	2.8344	1.0965
Drought	2	10	1.4794	1.1677	3.0113	1.3496
Drought	2	10	1.6355	1.2833	2.3507	1.5994
Drought	2	10	1.8145	1.2226	3.0555	1.0059
Drought	2	10	1.9813	1.4297	2.7836	1.4173
Drought	2	10	1.9782	1.3295	3.7148	1.6708
Drought	2	10	2.12	1.3027	3.6234	1.4169
Drought	2	10	1.7049	1.362	3.469	1.5229
Drought	2	10	2.2409	1.2887	3.1423	1.4401
Drought	2	15	2.2705	1.7368	4.0835	1.386
Drought	2	15	2.2815	1.6171	3.9321	1.4037
Drought	2	15	2.3067	1.6239	3.9391	1.3194
Drought	2	15	2.3313	1.5102	3.7591	1.4635
Drought	2	15	2.2576	1.5626	3.7787	1.5372
Drought	2	15	2.2476	1.6833	3.699	1.4515
Drought	2	15	2.2636	1.486	3.7319	1.4374
Drought	2	15	2.2473	1.6081	3.8202	1.3682
Drought	2	15	2.2383	1.5755	3.9779	1.5055
Drought	2	15	2.3009	1.4241	3.8398	1.5007
Drought	2	15	2.2571	1.4014	3.5591	1.6172
Drought	2	15	2.2498	1.4818	3.5942	1.4352
Drought	2	15	2.2396	1.4029	3.7756	1.5788
Drought	2	15	2.257	1.4615	3.6889	1.672
Drought	2	15	2.2475	1.3895	3.7653	1.5795
Drought	2	20	1.2538	0.834	2.13	2.33
Drought	2	20	1.4466	0.7423	2.1288	1.5491
Drought	2	20	0.7354	0.7307	2.1337	1.5171
Drought	2	20	1.9612	0.9387	2.11	2.2705
Drought	2	20	1.4564	0.4728	2.0667	1.5485
Drought	2	20	1.3445	0.9014	2.1455	3.2295
Drought	2	20	2.676	0.8884	2.2131	2.724
Drought	2	20	1.7484	0.7255	2.1354	2.5818
Drought	2	20	2.4411	0.5516	2.0003	2.163
Drought	2	20	3.0875	1.112	2.1772	2.8186
Drought	2	20	2.3763	1.1168	2.196	1.7946
Drought	2	20	1.4272	1.0684	2.1564	1.7309
Drought	2	20	1.9988	0.9538	2.2001	2.1716
Drought	2	20	2.9235	1.1862	2.2403	2.2146
Drought	2	20	2.5254	1.1653	2.3066	2.335
Drought	2	25	1.0541	0.4162	1.8616	2.1963
Drought	2	25	1.0599	0.4068	1.23	2.1472
Drought	2	25	1.0062	0.652	1.5424	1.9695
Drought	2	25	0.9812	0.551	1.6329	2.2279
Drought	2	25	1.0619	0.5626	1.483	1.433
Drought	2	25	1.1179	0.816	2.2051	1.613
Drought	2	25	1.1847	0.7072	1.9691	1.9501
Drought	2	25	1.1704	0.7475	1.6585	1.7058
Drought	2	25	1.1891	0.6753	1.8055	1.6022
Drought	2	25	1.2423	0.5744	1.7844	1.5154
Drought	2	25	1.0859	0.7441	2.0448	1.5573
Drought	2	25	1.1182	0.6882	1.8915	1.2055
Drought	2	25	1.1809	1.0356	1.9839	1.5156
Drought	2	25	1.1006	0.8067	1.8864	1.2974
Drought	2	25	1.125	0.6828	1.7582	1.5121
Drought	2	30	0.955	0.4934	1.0353	1.0865
Drought	2	30	0.53	0.489	0.9625	1.2895
Drought	2	30	0.6468	0.5475	1.3244	1.4699
Drought	2	30	0.3984	0.5243	1.4364	1.3969
Drought	2	30	0.8095	0.5494	1.1826	1.1704
Drought	2	30	1.0743	0.623	1.8255	1.7288
Drought	2	30	0.9497	0.5475	1.4247	1.4471
Drought	2	30	0.9211	0.7824	1.5331	1.6569
Drought	2	30	1.2928	0.7073	1.8806	1.3644
Drought	2	30	0.8316	0.7298	1.7932	1.2798
Drought	2	30	0.7183	0.668	1.8439	1.6831
Drought	2	30	1.029	0.554	1.4021	1.4936
Drought	2	30	0.8984	0.5705	1.5781	1.527
Drought	2	30	0.738	0.4945	1.3608	1.4243
Drought	2	30	1.1313	0.6501	1.2653	1.5586

## Sheet: leaf proline
treatment	처리구	day	Proline (mg/0.1g fresh.wt.)
Control	1	1	2.49
Control	1	1	2.33
Control	1	1	2.4
Control	1	1	2.28
Control	1	1	2.2
Control	1	1	2.2
Control	1	1	2.21
Control	1	1	2.33
Control	1	1	2.1
Control	1	1	2.25
Control	1	1	2.31
Control	1	1	1.99
Control	1	1	2.2
Control	1	1	2
Control	1	1	2.26
Control	1	5	1.58
Control	1	5	1.56
Control	1	5	1.54
Control	1	5	1.51
Control	1	5	1.51
Control	1	5	1.58
Control	1	5	1.63
Control	1	5	1.59
Control	1	5	1.61
Control	1	5	1.65
Control	1	5	1.55
Control	1	5	1.55
Control	1	5	1.53
Control	1	5	1.53
Control	1	5	1.48
Control	1	10	1.35
Control	1	10	0.9
Control	1	10	1.2
Control	1	10	1.08
Control	1	10	1.07
Control	1	10	1.01
Control	1	10	1.08
Control	1	10	0.98
Control	1	10	1.2
Control	1	10	1.18
Control	1	10	0.87
Control	1	10	0.95
Control	1	10	0.84
Control	1	10	0.83
Control	1	10	0.85
Control	1	15	1.41
Control	1	15	1.07
Control	1	15	1.17
Control	1	15	1.35
Control	1	15	1.2
Control	1	15	1.17
Control	1	15	1.21
Control	1	15	1.35
Control	1	15	1.37
Control	1	15	1.31
Control	1	15	1.13
Control	1	15	1.07
Control	1	15	1.18
Control	1	15	1.04
Control	1	15	0.88
Control	1	20	1.09
Control	1	20	1.1
Control	1	20	1.09
Control	1	20	1.09
Control	1	20	1.07
Control	1	20	1.15
Control	1	20	1.13
Control	1	20	1.16
Control	1	20	1.12
Control	1	20	1.18
Control	1	20	1.08
Control	1	20	1.08
Control	1	20	1.1
Control	1	20	1.17
Control	1	20	1.12
Control	1	25	1.43
Control	1	25	1.62
Control	1	25	1.58
Control	1	25	1.54
Control	1	25	1.53
Control	1	25	1.48
Control	1	25	1.52
Control	1	25	1.48
Control	1	25	1.27
Control	1	25	1.36
Control	1	25	1.3
Control	1	25	1.38
Control	1	25	1.4
Control	1	25	1.28
Control	1	25	1.54
Control	1	30	1.59
Control	1	30	1.5
Control	1	30	1.4
Control	1	30	1.39
Control	1	30	1.58
Control	1	30	1.78
Control	1	30	1.52
Control	1	30	1.91
Control	1	30	1.66
Control	1	30	1.53
Control	1	30	1.85
Control	1	30	1.69
Control	1	30	1.71
Control	1	30	2.11
Control	1	30	1.89
Drought	2	1	1.51
Drought	2	1	1.54
Drought	2	1	1.52
Drought	2	1	1.56
Drought	2	1	1.52
Drought	2	1	1.53
Drought	2	1	1.53
Drought	2	1	1.51
Drought	2	1	1.53
Drought	2	1	1.51
Drought	2	1	1.51
Drought	2	1	1.5
Drought	2	1	1.5
Drought	2	1	1.49
Drought	2	1	1.51
Drought	2	5	1.15
Drought	2	5	1.21
Drought	2	5	1.18
Drought	2	5	1.21
Drought	2	5	1.19
Drought	2	5	1.08
Drought	2	5	1.04
Drought	2	5	1.14
Drought	2	5	1.02
Drought	2	5	1.11
Drought	2	5	1.2
Drought	2	5	1.03
Drought	2	5	1.11
Drought	2	5	1.11
Drought	2	5	1.1
Drought	2	10	1.4
Drought	2	10	1.57
Drought	2	10	1.41
Drought	2	10	1.45
Drought	2	10	1.43
Drought	2	10	1.37
Drought	2	10	1.52
Drought	2	10	1.57
Drought	2	10	1.61
Drought	2	10	1.54
Drought	2	10	1.61
Drought	2	10	1.51
Drought	2	10	1.61
Drought	2	10	1.62
Drought	2	10	1.49
Drought	2	15	1.6
Drought	2	15	1.45
Drought	2	15	1.36
Drought	2	15	1.33
Drought	2	15	1.41
Drought	2	15	1.44
Drought	2	15	1.41
Drought	2	15	1.4
Drought	2	15	1.18
Drought	2	15	1.17
Drought	2	15	1.2
Drought	2	15	1.28
Drought	2	15	1.23
Drought	2	15	1.35
Drought	2	15	1.29
Drought	2	20	1.51
Drought	2	20	1.46
Drought	2	20	1.67
Drought	2	20	1.49
Drought	2	20	1.49
Drought	2	20	1.73
Drought	2	20	1.51
Drought	2	20	1.71
Drought	2	20	1.66
Drought	2	20	1.54
Drought	2	20	1.36
Drought	2	20	1.55
Drought	2	20	1.51
Drought	2	20	1.43
Drought	2	20	1.5
Drought	2	25	2
Drought	2	25	2.32
Drought	2	25	1.95
Drought	2	25	1.98
Drought	2	25	2.15
Drought	2	25	2.2
Drought	2	25	2.16
Drought	2	25	2.07
Drought	2	25	2.71
Drought	2	25	2.57
Drought	2	25	2.27
Drought	2	25	3.24
Drought	2	25	2.26
Drought	2	25	2.57
Drought	2	25	2.56
Drought	2	30	3.57
Drought	2	30	3.71
Drought	2	30	3.95
Drought	2	30	3.7
Drought	2	30	3.52
Drought	2	30	4.04
Drought	2	30	4.03
Drought	2	30	3.64
Drought	2	30	4.03
Drought	2	30	4.37
Drought	2	30	3.66
Drought	2	30	3.97
Drought	2	30	4.19
Drought	2	30	4.14
Drought	2	30	3.93
